1 **Distal regulatory sequences contribute to diversity in brain oxytocin**  
2 **receptor expression patterns and social behavior**

3

4 Qi Zhang<sup>1,2,3,\*</sup>, Luis Augusto Ejy Nagai<sup>4</sup>, Mina Tsukamoto<sup>1</sup>, Lenin C. Kandasamy<sup>1</sup>,  
5 Kiyoshi Inoue<sup>5</sup>, Maria F. Pires<sup>1</sup>, Minsoo Shin<sup>1</sup>, Yutaro Nagasawa<sup>1</sup>, Tsetsegee Sambuu<sup>1</sup>,  
6 Sonoko Ogawa<sup>6</sup>, Kenta Nakai<sup>7</sup>, Shigeyoshi Itoharu<sup>2</sup>, Larry J Young<sup>3,5,8</sup>

7

8 <sup>1</sup>Laboratory for Social Neural Networks, Faculty of Human Sciences, University of  
9 Tsukuba, Japan; <sup>2</sup>Laboratory for Behavioral Genetics, CBS, RIKEN, Japan; <sup>3</sup>Center for  
10 Social Neural Networks, Faculty of Human Sciences, University of Tsukuba, Japan;  
11 <sup>4</sup>Institute for Quantitative Biosciences, The University of Tokyo, Japan; <sup>5</sup>Center for  
12 Translational Social Neuroscience, Emory National Primate Research Center, Emory  
13 University, USA; <sup>6</sup>Laboratory of Behavioral Neuroendocrinology, Faculty of Human  
14 Sciences, University of Tsukuba, Japan; <sup>7</sup>Laboratory of Functional Analysis in silico,  
15 Human Genome Center, The University of Tokyo, Tokyo, Japan; <sup>8</sup>Department of  
16 Psychiatry and Behavioral Science, Emory University, USA.

17

18 \*Correspondence: [zhangqi@human.tsukuba.ac.jp](mailto:zhangqi@human.tsukuba.ac.jp) or [qi.zhang@a.riken.jp](mailto:qi.zhang@a.riken.jp);

19

20

21 Classification: Biological Science: Neuroscience

22

23 Keywords: oxytocin system, behavioral evolution, topologically associating domain  
24 (TAD), bacterial artificial chromosome (BAC), brain, mammary gland, partner  
25 preference, maternal care, evolvability.

26

27 The PDF file includes:

28 Main Text

29 Figures 1 to 4

30 Supplementary Figures 1 to 6, supplementary Tables 1 and 2

31

32

## 33 Summary

34 The oxytocin receptor (OXTR) modulates social behaviors in a species-specific manner.  
35 Remarkable inter- and intraspecies variation in brain OXTR distribution are associated  
36 with diversity in social behavior. To test the causal effect of developmental variation of  
37 OXTR expression on the diversity of social behaviors, and to investigate potential genetic  
38 mechanisms underlying the phylogenetic plasticity in brain *Oxtr* expression, we  
39 constructed BAC transgenic mice harboring the entire prairie vole *Oxtr* locus with the  
40 entire surrounding intergenic regulatory elements. Eight independent “volized” *prairie*  
41 *vole-Oxtr* (*pvOxtr*) mouse lines were obtained; remarkably, each line displayed a unique  
42 pattern of brain expression distinct from mice and prairie voles. Four *pvOxtr* lines were  
43 selected for further investigation. Despite robust differences in brain expression, *Oxtr*  
44 expression in mammary tissue was conserved across lines. These results and  
45 topologically associating domain (TAD) structure analysis suggest that *Oxtr* expression  
46 patterns in brain, but not other tissues, involve contributions of distal regulatory elements  
47 beyond our BAC construct. Moreover, “volized” mouse lines with different brain *Oxtr*  
48 expression patterns showed differences in partner preference and maternal behaviors. We  
49 speculate that transcriptional hypersensitivity to variable distal chromosomal sequences  
50 through long-distance interactions with proximal regulatory elements may contribute to  
51 “evolvability” of brain *Oxtr* expression. The “evolvability” of brain *Oxtr* expression  
52 constitutes a transcriptional mechanism to generate variability in brain OXTR which,  
53 through natural selection, can generate diversity in adaptive social behaviors while  
54 preserving critical peripheral expression. Transcriptional lability of brain OXTR  
55 expression may also contribute to variability in social phenotype in humans, including  
56 psychiatric outcomes.

57

## 58 Introduction

59 Brain oxytocin receptors (OXTR) regulate a wide range of social behaviors including  
60 social recognition, maternal care, social bonding, empathy related behaviors, and  
61 aggression [1-3]. In contrast to sex steroid receptors, which have highly conserved brain  
62 expression patterns across species, OXTR shows remarkable inter- and intra-species  
63 variation in brain distribution [2, 4]. For example, monogamous prairie voles have a brain  
64 OXTR distribution in cortex, striatum and amygdala that [4]is distinct from promiscuous  
65 montane voles and laboratory rats and mice. Furthermore, there is robust individual  
66 variation in brain OXTR expression among prairie voles that is associated with single  
67 nucleotide polymorphisms (SNPs) in the OXTR locus (*Oxtr*), and this variation predicts

68 pair bonding behavior and resilience to early life social neglect [5-8]. Different species of  
69 primates also differ in brain OXTR distribution [9], and SNPs in the human OXTR have  
70 been linked to variation in social function [10, 11]. Thus, variation in OXTR distribution  
71 in brain likely constitutes a mechanism for the emergence of diverse social traits,  
72 potentially including psychiatric endophenotypes.

73 Acute overexpression or knockdown of OXTR in a specific brain region alters social  
74 attachment and parental behaviors in monogamous prairie voles but not polygamous  
75 meadow voles [7, 12, 13]. A recent report showed that social attachment can occur in  
76 constitutive *Oxtr* knockout prairie voles [14], suggesting that developmental OXTR  
77 signaling may be essential for behavioral dependency on OXTR later in life. The direct  
78 cause-effect relationship between species-specific OXTR expression pattern and social  
79 behaviors, either developmentally or in adulthood, is unclear.

80 The evolution of gene expression patterns could be mediated by *cis* (via linked  
81 polymorphisms) or *trans* (through diffusible products of distal genes, e.g., transcription  
82 factors) changes, as a result of adaptation to the environment [15-17]. *Cis*-regulatory  
83 differences are more commonly responsible for adaptive evolution and interspecific  
84 divergence [18]. To explore the transcriptional mechanisms giving rise to species-specific  
85 *Oxtr* expression and social behavior, we created transgenic mice using a prairie vole *Oxtr*  
86 (*pvOxtr*) bacterial artificial chromosome (BAC). The BAC construct covers the full  
87 coding sequence, introns and the entire intergenic region of the *pvOxtr* with its  
88 neighboring genes. We expected two possible results: (1) our BAC construct  
89 accommodates all the critical promoter/enhancers elements responsible for species- and  
90 tissue-specific expression, therefore the *pvOxtr* transgenic mice would express brain  
91 *pvOxtr* in a prairie vole-like pattern; (2) The regulatory elements essential for species- and  
92 tissue-specific expression of *pvOxtr* in our BAC construct are not complete, the *pvOxtr*  
93 transgenic mice would express *pvOxtr* in a pattern different from either the prairie vole or  
94 the mouse. In either case, we can address our question: do developmentally distinct  
95 patterns of brain OXTR expression give rise to different social behaviors?

96 We obtained 8 lines of *pvOxtr* mice with germline transmission, each “volized” (*pvOxtr*)  
97 mouse line, i.e., each different integration site, displayed a unique pattern of expression in  
98 brain distinct from that of either wildtype mice or prairie voles. Intriguingly, *pvOxtr*  
99 expression was conserved in mammary gland across different lines. Moreover, different  
100 “volized” mouse lines showed differences in partner preference and maternal behaviors.  
101 These results demonstrate that transcriptional redistribution of brain OXTR in space and  
102 during development can support the emergence of variation in social preference and

103 parental behaviors, which natural selection could act upon and amplify in niches where  
104 the novel behavior is adaptive. In addition, our results provide important clues to  
105 understand the genetic mechanism underlying species differences in brain gene  
106 expression.

107

## 108 **Results**

### 109 **Creation of the *pvOxtr-P2A-Cre* BAC transgenic mice**

110 BAC vectors can accommodate dispersed cis-regulatory elements across large regions of  
111 genome. Transgene expression from BAC constructs are generally resistant to insertion  
112 position effects [19] due to both the large spans of insulating genetic material which  
113 protect the transgene cassette from the influence of the chromosomal environment, and  
114 through the inclusion of necessary regulatory elements such as enhancers, silencers, locus  
115 control regions, and matrix attachment regions [20, 21]. Large-scale screening of CNS  
116 gene expression in BAC transgenic mice by the GENSAT (Gene Expression Nervous  
117 System Atlas) Project found that more than 85% of BACs express reproducibly in  
118 multiple independent transgenic lines and reporter gene expression faithfully recapitulates  
119 endogenous gene expression patterns [22-24]. Indeed, reproducible expression from  
120 mouse BAC vectors has been achieved for more than 500 genes [22-24]. Those that don't  
121 express reproducibly are influenced by variation in BAC copy number and insertion sites  
122 [25]. BAC engineering has also been used to mediate cross-species transgene expression.  
123 A large number of mouse models of human dominant neurodegenerative disorders have  
124 been created using human BAC transgene approaches. These model mice successfully  
125 express human transgenes in human-like patterns and recapitulate disease-like  
126 phenotypes [26-30]. We therefore decided to use BAC approaches to create “volized”  
127 *Oxtr* mouse lines.

128 The most important determinant for correct expression from BAC vectors is inclusion of  
129 as much of the intergenic region surrounding a gene of interest within the BAC construct  
130 as possible[25]. To create *pvOxtr-P2A-Cre* BAC transgenic mouse line, we obtained a  
131 BAC clone (GeneBank: DP001214.1) from a prairie vole BAC library (CHORI-232) [31,  
132 32] that includes the entire *pvOxtr* locus (the coding sequence and all the introns) with the  
133 full intergenic sequence upstream (150kb) and downstream of the *pvOxtr* coding region  
134 (9kb) (Fig1 B). The BAC clone contains a portion of *Rad18*, minus the first 11 exons,  
135 located upstream of *pvOxtr*, and *Cav3*, minus the first exon including the start codon,  
136 downstream of *pvOxtr*. Therefore, there will be no interference of these two flanking  
137 transgenes on behavior, and the proximal topological structure around *pvOxtr* locus is

138 preserved to the maximum extent. A P2A-NLS-Cre cassette was inserted in-frame just  
139 before the *Oxtr* stop codon to ensure co-expression of *Cre* and *Oxtr* (Fig1 C). Transgenic  
140 mice were generated by pronuclear injection using C57BL/6J zygotes. Proper integration  
141 of the reporter into the BAC clone was confirmed using gene specific PCR assays and  
142 sequencing (Fig1 C, D and data not shown). We obtained 11 founder mice carrying the  
143 transgenes, which was verified by PCR with multiple primer sets (Fig1 C, E). One  
144 founder line was sterile, and two founder lines did not show germ-line transmission.  
145 Eight founder lines successfully produced offspring and stably transmitted the transgene  
146 to at least 3 generations. We named these lines “Koi”, meaning “love” in Japanese.

147

148 **Each Koi line showed a unique expression pattern of transgene in brain, yet**  
149 **conserved expression in mammary gland.**

150 We systemically evaluated 8 Koi lines by crossing them with ROSA-26-NLS-*LacZ* mice,  
151 a Cre reporter mouse line expressing nuclear-localized beta-galactosidase [33, 34]. Since  
152 Lac-Z is only expressed in the nucleus of double positive (CRE+, LacZ+) cells, but not in  
153 the neuronal processes, we could easily assess the expression pattern of our transgene. We  
154 found that each Koi founder line displayed a unique pattern of expression in brain distinct  
155 from that of wildtype mice or prairie voles (Fig2A-O, and supplementary Fig1). Almost  
156 all Koi lines showed transgene expression in olfactory bulb, lateral septum (Fig2F-I  
157 Supplementary Fig1B,E,H,K) and ventromedial nucleus of the hypothalamus (Fig2K-N  
158 Supplementary Fig1C,F,I,L), though with different intensities, suggesting that these  
159 regions constitute a stable core *Oxtr* expression network, as these regions also express  
160 OXTR in mice and voles [35, 36]. Several Koi lines expressed the transgene in some  
161 brain regions specific for vole *Oxtr* expression, including nucleus accumbens (NAc)  
162 (Fig2A,B,D Supplementary Fig1A,G,J), prefrontal cortex (PFC) (Fig2A,B,C  
163 Supplementary Fig1J), lateral amygdala (Fig2K,L,M Supplementary Fig1C,I,L) and deep  
164 layers of cingulate cortex (Fig2A,B,C Supplementary Fig1C,L), which suggested that cis  
165 regulatory elements in the BAC are capable of mediating the expression of *Oxtr* in the  
166 reward and reinforcement circuitry of brain, albeit depending on the sequence/structure of  
167 distal sequences >150 kb upstream and >21 kb downstream of the transcription start site.  
168 None of the Koi lines exactly “mirrored” the vole-specific expression pattern. Six of the  
169 Koi lines expressed the transgene in broad areas of thalamus (Fig2K,L,N and  
170 Supplementary Fig1C,I,L), reminiscent of the strong expression of V1a vasopressin  
171 receptor (*Avpr1a*) in the thalamus [4]. Intriguingly, the expression of OXTR in mammary

172 glands showed similar pattern among all the Koi lines and *mouseOxtr(mOxtr)-Ires-Cre*  
173 knock-in line (Fig2P-T and Supplementary Fig2).

174 Transgenes that are introduced by pronuclear injection typically integrate into a single  
175 site of the genome as tandem concatemers [37]. BAC copy number variation and  
176 different insertional loci can lead to distinct patterns of ectopic expression, and increased  
177 BAC transgene copy numbers often correlate with increased BAC gene expression [25].  
178 We then examined the relationship between transgene copy number and LacZ signal  
179 using quantitative genomic PCR [38]. As expected, the copy number of WT,  
180 heterozygous and homozygous *mOxtr-Ires-Cre* knock-in mice was 0, 1 and 2 respectively  
181 (Figure2Z). The copy number of transgene in Koi lines are: Koi-1 (12), Koi-2 (2), Koi-3  
182 (2), Koi-4 (1), Koi-5 (2), Koi-6 (4), Koi-7 (9), Koi-8 (3). Koi-6 and Koi-7 showed the  
183 most limited expression of reporter gene, though the copy number of transgene were 4  
184 and 9 respectively. Koi-4 showed strong expression of reporter gene in NAc, septum and  
185 thalamus, though there was only 1 copy of transgene. Therefore, integration site rather  
186 than copy number is the reason of the variant BAC transgene expression patterns across  
187 our Koi lines.

188

### 189 ***Oxtr* is localized to a boundary of large Topologically Associating Domains**

190 The divergent brain expression patterns across our Koi lines suggest that distal elements  
191 external to our BAC cassette may contribute to the variation in *Oxtr* expression.  
192 Topologically associating domains (TADs) represent a key feature of hierarchical genome  
193 organization comprising chromatin regions that frequently interact within the chromatin  
194 domain while insulating regulatory interactions across TAD boundaries [39-42]. Hi-C  
195 assays provide a genome-wide view of chromosome conformation in multiple layers,  
196 including TADs [43, 44]. Utilizing publicly available 3D chromatin datasets from mouse  
197 (Supplementary Table1), we discovered that *Oxtr* is consistently located at the boundary  
198 region of TAD structures (approximately 2000kb) across several tissues and cell lines  
199 (Supplementary Fig3A). Specifically, only in brain related samples (whole brain tissue,  
200 neural progenitor cells, and cortex tissue), *Oxtr* is situated at the boundary of a large  
201 inter-TAD interaction between two neighboring TADs, forming larger TAD structures  
202 (approximately 4000kb) (Supplementary Fig3A). In contrast, the oxytocin peptide gene,  
203 *Oxt*, which is expressed in a highly conserved brain pattern across vertebrates, lacks such  
204 organized large TAD structures (Supplementary Fig3B). Analysis with the datasets from  
205 human brain-related samples revealed that human *Oxtr* is also localized at the boundary  
206 region of TAD structures, though the heatmap showed a clearly distinct pattern with that



207 of the mouse (Supplementary Table2; Supplementary Fig4A). Like in mouse, human *Oxt*  
208 doesn't show typical TAD structures (Supplementary Fig4 B). Although the Hi-C data  
209 was not generated from prairie vole tissues, it demonstrates that the TAD landscape is  
210 dramatically different between *Oxtr* and *Oxt* and highlights that the 3D genomic structure  
211 surrounding the *Oxtr* gene varies across species and tissues.

212

### 213 **Adult brain OXTR binding patterns differ across Koi lines**

214 To detect the distribution of OXTR protein in adult Koi lines without the interference of  
215 endogenous mouse OXTR (mOXTR) signal, Koi lines were crossed with *mOxtr*<sup>-/-</sup> mice  
216 and pvOXTR binding was detected using receptor autoradiography. We focused on 4 Koi  
217 lines: Koi-1, Koi-2, Koi-3 and Koi-4 based on the strong expression of reporter gene in  
218 behaviorally relevant neuronal populations. Autoradiography demonstrated functional  
219 pvOXTR in brain resembling to some extent Cre-induced reporter gene expression  
220 (Figure 3). Brain OXTR binding of Koi-3 was consistent with Lac-Z expression in the  
221 reporter line (Fig2C, H, M and Figure3 J-L). Interestingly, the OXTR binding in PFC of  
222 Koi-3 was similar to that of prairie vole. In contrast, Koi-4 showed low OXTR binding in  
223 NAc when compared with the high Lac-Z staining (Fig2D, Figure3M), consistent with  
224 transient *pvOxtr* expression during development, a pattern previously reported in rat NAc  
225 [45]. Cre-dependent reporter gene product reflects the cumulative expression history of  
226 the transgene throughout development. Koi-2, the line which displayed the expression of  
227 reporter genes in the broadest regions, did not show strong signal in autoradiography,  
228 again suggesting developmental changes in transgene expression. It is interesting that  
229 Layer IV of cortex in Koi-4 showed strong OXTR binding (Figure3 N and O), which is  
230 highly likely to originate from the axon projections from the thalamus (Fig2N), as was  
231 previously reported for NAc projections in voles [46]. Consistent with Lac-Z expression,  
232 we do not see a clear relationship between OXTR binding and transgene copy number.  
233 For example, Koi-1 showed low OXTR signal (Fig3 D, E, F) with the highest copy  
234 number, while Koi-4 showed very strong OXTR signal at lateral septum and thalamus  
235 (Fig3 N, O), with the lowest copy number. *Oxtr* expression level was further confirmed  
236 with qRT-PCR (Supplementary Fig 5, 6). Though OXTR binding in NAc of Koi-4 was  
237 barely detected using autoradiography, the more sensitive qRT-PCR revealed that adult  
238 Koi-4 mice had the highest *Oxtr* mRNA signal in the striatum, several fold higher than  
239 WT, consistent with the Lac-Z staining in the reporter line.

240 Although none of our Koi lines mirrored the endogenous OXTR expression in prairie  
241 voles, we confirmed strong expression of *pvOxtr* in olfactory bulb of Koi-1line, PFC and

242 amygdala of Koi-3line, striatum and thalamus of Koi-4 lines, and the broad expression of  
243 *pvOxtr* in Koi-2 line. As OXTR signaling in some of these regions are similar to that in  
244 voles, albeit in separate lines, and postulated to be involved in vole social behavior [47],  
245 we used these lines to address the question of whether developmental variation in *Oxtr*  
246 transcription in brain can lead to variation in social behaviors.

247

### 248 **Different Koi lines showed diverse behaviors in a Partner Preference Test**

249 The partner preference test is widely used as a laboratory proxy for pair bonding in  
250 prairie voles. In a pilot study, we found that Kio-4 female mice on a *mOxt<sup>+/+</sup>* background  
251 showed a preference for their mate relative to a novel male. We then focused on the  
252 females of 4 lines (Koi-1, 2, 3, 4) based on transgene expression in PFC, BLA or NAc.  
253 We bred the transgenic mice with *mOxtr<sup>-/-</sup>* mice (both on C57/B6 background) to generate  
254 offspring expressing only *pvOxtr*. Partner preference tests (PPT) were performed in  
255 ovariectomized females after 21 days of cohabitation with 3 mating bouts elicited by  
256 estrogen and progesterone injections on days 2, 9 and 16. We divided our analysis into 3  
257 phases (Fig4A, B). In the habituation phase, the experimental subject was habituated to  
258 the chamber for 5 minutes with both pen-boxes empty. In the recognition phase, the  
259 partner stimulus animal was restricted in one pen-box, and a novel “stranger” male was  
260 restricted in another pen-box, and the experimental female was allowed to explore the  
261 arena for 10 minutes to test social novelty preference. In the preference phase, the  
262 positions of the partner stimulus animal and the “stranger” stimulus animal were switched  
263 to avoid position bias, and the female was allowed to explore the chamber for an  
264 additional 20 minutes.

265 Mixed ANOVA was conducted to examine the effect of genotype and the stimulus box on  
266 the area stay time during all the phases. In the habituation phase (Fig4C), there was no  
267 statistically significant interaction between the effects of genotype and position of empty  
268 pen-box on stay time,  $F(4, 60) = 0.69$ ,  $p = 0.6$ . There was no difference in position  
269 preference for all the groups,  $F(1,60) = 0.03$ ,  $p = 0.87$ . In the recognition phase (Fig4D),  
270 there was a main effect of stimulus animal (i.e., partner or stranger) on stay time, the time  
271 staying in close proximity to the partner was significantly shorter than the time stay with  
272 stranger animal ( $F(1,60) = 15.38$ ,  $p < 0.001$ ). There was a main effect of genotype on social  
273 stay time,  $F(4,60) = 2.62$ ,  $p < 0.05$ , and a significant interaction between the effects of  
274 genotype and stimulus animal on area stay time,  $F(4, 60) = 2.61$ ,  $p < 0.05$ . Bonferroni  
275 adjusted pairwise comparisons were applied to analyze the simple main effects. Koi-4 and  
276 WT mice spent significantly longer time in “stranger” area than in “partner” area ( $p < 0.05$ ),



277 demonstrating a typical novelty preference. There was no significant difference between  
278 the stay time with "stranger" and "partner" for Koi-1 ( $p=0.96$ ), Koi-2 ( $p=0.49$ ) and Koi-3  
279 ( $p=0.09$ ) mice. In the preference phase (Fig5E), conducted after both stimulus mice were  
280 presumably familiar following the initial 10 min recognition phase, there was no main  
281 effect of stimulus animal on stay time,  $F(1,60)=0.04$ ,  $p=0.84$ . There was no main effect of  
282 genotype on stay time either,  $F(4,60)=1.36$ ,  $p=0.26$ . There was a statistically significant  
283 interaction between the effects of genotype and stimulus animal on area stay time,  $F(4,60)$   
284  $=4.64$ ,  $p<0.01$ . Bonferroni adjusted pairwise comparisons revealed that Koi-2 mice spent  
285 significantly longer time in "stranger" area than in "partner" area ( $p<0.05$ ). In contrast, Koi-  
286 4 mice spent significantly longer time in "partner" area than in "stranger" area ( $p<0.01$ ).  
287 There was no significant difference between the stay time with "stranger" and "partner" for  
288 WT ( $p=0.99$ ), Koi-1 ( $p=0.16$ ) or Koi-3 ( $p=0.45$ ) mice.

289

### 290 **Different Koi lines showed diverse behaviors in Pup Retrieval Test**

291 Based on the abundant pvOXTR of Koi-3 and Koi-4 in reward-related brain regions  
292 (Fig3J-O), and the role of OXTR in mediated maternal care in mice and voles [48-50], we  
293 further tested the parental behaviors of these two lines in virgins (Fig4F, G). Mixed  
294 ANOVA was conducted to examine the effect of genotype and pup number (1-3) on the  
295 latency of pup retrieval. Mauchly's test showed that the sphericity was violated.  
296 Therefore, the Greenhouse-Geisser correction was used for the repeated measures  
297 ANOVA. There was a significant main effect of genotype on latency to retrieve,  $F(2,48)$   
298  $=29.58$ ,  $p<0.0001$ . Koi-4 took a significantly longer time to retrieve all the pups than WT  
299 and Koi-3 ( $p<0.0001$  for both). There was also a significant interaction between the  
300 effects of genotype and retrieved pup number on the retrieval latency,  $F(2.40, 57.49) =$   
301  $4.45$ ,  $p<0.05$ . Post Hoc multiple comparisons with Bonferroni correction revealed that  
302 Koi-4 took a significantly longer time to accomplish the 1st retrieval ( $p<0.001$ ), the 2nd  
303 retrieval ( $p<0.0001$ ), and the 3rd retrieval ( $p<0.0001$ ) when compare to WT and Koi-3.  
304 And Koi-3 took a significantly shorter time to accomplish the 1st retrieval ( $p<0.05$ ), the  
305 2nd retrieval ( $p<0.01$ ), and the 3rd retrieval ( $p<0.01$ ) when compare to WT.

306 Crouching time was analyzed as well (Fig4F, H). There was a statistically significant  
307 difference between groups as determined by one-way ANOVA ( $F(2,48) = 27.56$ ,  $p$   
308  $<0.0001$ ). A Bonferroni post hoc test revealed that the crouching time of Koi-3 was  
309 statistically significantly longer than WT ( $p<0.01$ ) and Koi-4 ( $p<0.0001$ ). Additionally, the  
310 crouching time of Koi-4 was statistically significantly shorter than WT ( $p<0.01$ ).

311 Therefore, two Koi lines with different OXTR expression pattern demonstrated  
312 quantitative differences in parental behavior tests.

## 313 **Discussion**

### 314 **Diversity of developmental *Oxtr* expression patterns causes diversity of social** 315 **behaviors**

316 The diverse OXTR expression of our Koi lines is reminiscent of the diverse OXTR  
317 expression across different species. Species and individual differences in OXTR  
318 distribution in the brain have been associated with variation in social behaviors [2, 4].  
319 For instance, the monogamous prairie vole expresses high densities of *Oxtr* in the PFC,  
320 NAc and BLA compared to non-monogamous vole species or mice. Pharmacological and  
321 viral mediated siRNA manipulations of OXTR in adult vole PFC and NAc suggest that  
322 OXTR in these regions play a role in parental care and pair bonding[12, 13, 48].  
323 Furthermore, variation in prairie vole OXTR expression in brain are also associated with  
324 individual differences in parental behavior, pair bonding, and resilience to neonatal  
325 neglect[5, 8, 51, 52]. However, it is unclear whether inter- or intra-species variation in  
326 brain OXTR signaling during development, due to variation in brain expression pattern,  
327 is causally mediating diversity in social behaviors. We obtained expression in PFC, NAc  
328 and BLA regions in our Koi mice, but in 3 separate lines. These Koi lines with distinct  
329 brain OXTR expression pattern provided an opportunity to test the causal effect of  
330 development variation of OXTR expression on diverse social behaviors developmentally.

331 In contrast to wildtype mice, the Koi-4 line showed a preference for their mating partners  
332 over unfamiliar males, as is typically observed in prairie voles. Multiple studies showed  
333 that NAc and PFC play important roles in mediating partner preference behavior in  
334 prairie voles [53, 54]. Although the Koi-4 line showed robust transgene expressed in  
335 these regions using the Lac-Z reporter mouse method, qPCR and receptor  
336 autoradiography suggest more limited OXTR expression as adults, albeit several fold  
337 higher than WT mice, suggesting transient changes in transgene expression during  
338 development. Emerging research have shown that species differences exist in  
339 developmental patterns of OXTR expression. For example, pre-weaning rats have a  
340 transient peak OXTR specifically in NAc and cingulate cortex [55, 56], while mice have  
341 a transient peak of OXTR throughout the entire neocortex [57]. Transient OXTR  
342 expression may define sensitive periods for oxytocin to shape the brain development of  
343 those brain regions in a social stimulus dependent way[58]. OXTR signaling in the NAc  
344 during the first two weeks of life appear to shape adult partner preference behavior in  
345 prairie voles [5]. The brain regions that display transient appearance of OXTR are not

346 conserved across species, and transient OXTR expression may help to shape activity-  
347 dependent development and contribute to adult social behaviors in a species-specific  
348 manner [59]. Partner preference formation and maintenance needs to recruit multi- and  
349 cross-modality sensation, social recognition and social memory, selective attention,  
350 arousal, and reward systems. We propose a model that the sufficient upregulation of the  
351 OXTR expression in one or multiple of these systems can tune the network and boost  
352 partner preference behavior. In addition, the maternal behavior in Koi-3 and Koi-4 lines  
353 was enhanced and reduced, respectively. This result suggested that OXTR signaling  
354 facilitates social partner preference and maternal care by coordinating activity across  
355 different neural networks. A main conclusion of our study is that simply by redistributing  
356 OXTR binding in space and during development, variation in social preference and  
357 parental behaviors emerged, which conceivably could impart advantageous behaviors that  
358 natural selection could act upon and amplify. Future study will determine how the  
359 variation in OXTR distribution in our Koi lines affects neural circuits mediating social  
360 behaviors.

361

### 362 **A potential genetic mechanism contributing to diversity of brain OXTR expression** 363 **and social behavior**

364 The sex steroid and oxytocin systems play important roles in modulating reproductive  
365 and related social behaviors in vertebrates. Sexual behavior, e.g., the motivation to mate  
366 and motor patterns, is highly conserved across vertebrate species. By contrast, social  
367 behaviors, e.g., sociality, mating strategy (monogamy vs polygamy), parental and  
368 alloparental behaviors are more nuanced and can vary dramatically across species in the  
369 same genus or even between individuals of a single species. It is interesting, therefore,  
370 that the distribution of steroid receptors is quite conserved among species [60], while that  
371 of the OXTR is extremely diverse across and even within species [2, 4]. It is even more  
372 interesting that although the distribution of OXTR is diverse, its ligand, oxytocin, is  
373 expressed in a highly conserved neuroanatomical pattern in vertebrates [61]. Previous  
374 work showed that three independent rat lines with puffer fish oxytocin BAC transgene  
375 (containing 16 kb of 5' flanking regulatory sequence) expressed the *Fugu* oxytocin  
376 transcript specifically in oxytocin neurons in rat [62]. Moreover, a similar transgenic  
377 experiment transferring approximately 5 kb of the *Fugu* oxytocin already resulted in a  
378 faithful expression of the fish genes in mouse oxytocin neurons [63]. These studies  
379 suggest there is a remarkably conserved transcriptional regulatory machinery across  
380 species, even between the *Fugu* and rodent oxytocin genes, despite being separated by

381 400 million years of evolution. Finally, 2.6 kb of the oxytocin promoter is sufficient to  
382 faithfully express transgenes in oxytocin neurons when delivered using a viral vector[64].

383 Based on the principle of choosing a proper BAC clone to create BAC transgenic mice,  
384 the most important determinant for correct expression from BAC vectors is inclusion of  
385 as much as possible of the 5' and 3' intergenic region surrounding a gene of interest [23,  
386 25, 65]. The *pvOxtr* BAC clone we chose carries the entire *pvOxtr* locus with the full  
387 intergenic sequence upstream and downstream of *pvOxtr*. Though in some cases BAC  
388 sequences don't include the whole TAD, they still contain the critical tissue-specific  
389 control elements for the locus, and can confer reproducible, accurate expression patterns  
390 of transgenes [66]. However, the 8 lines we obtained demonstrated remarkably variant  
391 brain pvOXTR expression, distinct from both prairie vole and mouse. The different  
392 expression pattern is not from the copy number of transgenes. Instead, it is most likely  
393 due to the effects from different insertion sites of transgenes. These results are  
394 reminiscent to the observation that virtually every rodent or primate species examined has  
395 a unique distribution of OXTR binding in the brain. Our 3D genomic structure analysis  
396 using open databases showed that the mouse *Oxtr* and human *OXTR* loci sit within large  
397 TAD structures, while no typical TAD structure surrounds *Oxt* loci in either species.  
398 Considering the size of TADs where *Oxtr* locates in brain related tissues both in mouse  
399 and human (about 4000kb), certain regulatory elements (including insulator sequences)  
400 essential for brain-specific expression of *pvOxtr* may lie outside of the BAC region. This  
401 might explain why short promoter sequences suffice for faithful expression of oxytocin  
402 across species and when employing viral vectors, but a 200kb BAC is not adequate for  
403 precise, reproducible transcription regulation of *Oxtr*. This may also account for the  
404 transcriptional hypersensitivity of *pvOxtr* to chromosomal position effect in brain.

405 It is also noteworthy that *pvOxtr* expression in mammary gland were conserved across  
406 different Koi lines. These results suggested that the promoter/enhancer/insulator elements  
407 critical for mammary gland-specific expression of *pvOxtr* are encompassed by the BAC  
408 construct, and the regulation of *pvOxtr* expression in mammary gland is highly resistant  
409 to the position effect of integration sites. Our 3D genomic structure analysis using mouse  
410 datasets showed that the chromatin landscape differs considerably between brain-related  
411 tissues and other tissues. This is observed by an obvious increase of long-distance  
412 interactions between neighboring TADs, forming a larger TAD structure in brain-related  
413 tissues. We here propose a new genetic model of *Oxtr* expression regulatory machinery:  
414 The sequence proximal to *Oxtr* loci within the BAC construct is sufficient to form a  
415 complete regulatory unit. This unit is resistant to changes in interactions with distal

416 regulatory sequences and confer faithful expression of OXTR in peripheral tissues where  
417 OXTR expression is essential for reproduction. In contrast, interacting regulatory  
418 elements that govern brain region-specific expression of OXTR are dispersed over a large  
419 sequence, extending far beyond the BAC construct. This makes OXTR expression in  
420 brain susceptible to the chromosomal landscape, even at locations very distal to the gene  
421 loci. This is well aligned with the notion that subtle changes in 3D chromatin structure  
422 may result in substantial changes in local gene expression [67]. Such an organization  
423 could offer increased opportunities for chromosomal variation across species to impart  
424 evolvability (the capacity of an evolving system to generate or facilitate adaptive change)  
425 of *Oxtr* expression in the brain. Consequently, this would allow oxytocin to modulate  
426 novel neural circuits, which can then modify various facets of social behavior, leading to  
427 the evolution of diversity in social behaviors. If the resultant behavior is adaptive, the  
428 frequency of the mutation will increase in the population and the social behavioral profile  
429 of the population may change. Future work applying Hi-C and ChIP approaches on  
430 different brain regions and peripheral tissues from prairie vole, montane vole and our Koi  
431 lines to see the chromatin structure and epigenetic landscape surrounding *Oxtr*, will be  
432 very helpful to understand how TAD landscape and epigenetics influences *Oxtr* gene  
433 expression and social behavior traits.

434

435 There is other experimental evidence supporting the notion that brain expression of *Oxtr*  
436 is labile, sensitive to genetic variation. SNPs in the *Oxtr* intron explains 74% of the  
437 variance in striatal *Oxtr* expression and social attachment in prairie voles [8] and it is  
438 possible that these SNPs near *Oxtr* are linked to larger distal variations that affect brain  
439 *Oxtr* expression. Different *Oxtr*-reporter (either lac-z, EGFP or Venus etc.,) mice created  
440 from independent labs either by knock-in or BAC transgene methods showed different  
441 expression pattern in brain as well [25, 35, 65], further supporting the ultra-sensitivity  
442 and lability of *Oxtr* gene to subtle changes of distal cis sequence and local chromosomal  
443 architecture. Additionally, SNPs in the human OXTR predict OXTR transcripts in a brain  
444 regions-specific manner [68] as well as brain functional connectivity[69]. This  
445 transcriptional ultra-sensitivity to genomic variation appears to be tissue specific and  
446 mainly appears in brain, but not in mammary gland, which is responsible for essential  
447 lactation in mammals.

448 Another interesting point is that *Oxtr* is localized at TAD boundary regions in mouse and  
449 human. TAD boundaries are thought to be essential for normal genome function, given  
450 their roles in defining regulatory territories along chromosomes and in preventing

451 unintended enhancer-promoter interactions between adjacent chromatin domains. Cross-  
452 species multiple sequence alignments have revealed an enrichment of syntenic breaks at  
453 TAD boundaries[70]. Future studies will explore syntenic regions along the *Oxtr* TAD in  
454 different species.

455

456 **In summary**, we created mouse lines showing different expression pattern of brain  
457 OXTR using a BAC transgenic method. Our results suggest that complex, long-distance  
458 interactions between proximal and distal cis regulatory elements contribute to region-  
459 specific expression in brain, but not mammary tissue. The variability in transgene  
460 expression pattern in brain depending on integration site suggest that *Oxtr* expression is  
461 sensitive to large-scale chromosomal interactions, which may impart evolvability of *Oxtr*  
462 expression patterns in the brain. Subtle variation in chromatin landscape of *Oxtr* gene  
463 may alter long distance regulatory interactions, and thereby alter brain expression  
464 patterns and lead to the emergence of novel social behaviors, which may allow organisms  
465 to adapt to and survive variable environments. We speculate that this transcriptional  
466 evolvability may contribute to inter- and intra-specific *Oxtr* expression patterns in brain.  
467 We also confirmed for the first time the causal effect of developmental variation in brain  
468 *Oxtr* distribution on the diversity of social behaviors. Our mice lines with different *Oxtr*  
469 expression patterns display differences in partner preference and enhanced or reduced  
470 parental behaviors. This research on the origins of diversity in social behaviors across  
471 species may lead to conceptual understandings relevant for the development of treatments  
472 for psychiatric disorders.

473

#### 474 **Acknowledgements:**

475 This work was supported by the International Education and Research Laboratory  
476 Program of University of Tsukuba to L.Y., the RIKEN Incentive Research Project  
477 (100226201701100443) to Q.Z., the Brain Science Project, Center for novel science  
478 initiatives, National institutes of natural sciences (BS291003) to Q.Z., the RIKEN Aging  
479 Project (10026-201701100263-340120) to Q.Z., the JSPS Kakenhi Grant-in-Aid for  
480 Young Scientists (17K18362) to Q.Z., the JSPS Kakenhi Grant-in-Aid for Challenging  
481 Research (19K21807) to Q.Z., the JSPS Kakenhi Grant-in-Aid for Challenging Research  
482 (22K19478) to Q.Z., and the Takeda Medical Research Grant to Q.Z.. We thank Dr.  
483 Katsuhiko Nishimori (Tohoku University and Fukushima Medical University, Japan) for  
484 providing *mOxtr-Ires-Cre* knock-in line and *mOxtr<sup>-/-</sup>* mutant line; Dr. Cary Lai (Indiana  
485 University, USA), Dr. Takuji Iwasato (National Institute of Genetics, Japan) and Dr. Seiya



486 Mizuno(University of Tsukuba, Japan) for their advice on BAC vector construction; Dr.  
487 Volkhard Maeckel (CERN, Switzerland) for helping with image capturing; Dr. Yong  
488 Zhang (Tongji University, China) for the stimulating discussion about 3D chromatin  
489 structure, and we thank the Laboratory of Animal Resource Center of University of  
490 Tsukuba for pronuclear injection.

491

#### 492 **Author Contributions:**

493 Q.Z. conceived the project, designed the study, led the teamwork, conducted transgene  
494 vector construction and drafted manuscript. Q.Z. and L.N. and K.N analyzed Hi-C  
495 datasets. Q.Z., L.K. and M.T. conducted histological analysis. Q.Z. and M.P. analyzed  
496 transgene copy number and gene expression level. Q.Z. and K.I. conducted  
497 autoradiography analysis. Q.Z., L.K., M.T. and M.P. performed behavioral test and  
498 analyzed the data. Y.N. and T.S. performed ovariectomy surgery. L.K., M.T., M.S. and  
499 M.P. performed genotyping and mouse maintenance. S.I. provided advice and facility for  
500 transgene vector construction. L.Y helped conceive the project, provided advice for the  
501 whole project and edited the manuscript. All authors discussed the manuscript.

502

#### 503 **Declaration of Interests:**

504 The authors declare no competing interests.

505

#### 506 **Figure titles and Legends:**

507 **Fig.1 Construction of Koi lines.** (A) Example of the remarkable species difference of  
508 brain OXTR distribution. OXTR receptor autoradiography in dorsal caudate putamen  
509 (CP) and nucleus accumbens shell (NAccSh) of rat, mouse, and prairie voles (Adapted  
510 Froemke and Young[2]). (B) The *pvOxtr* BAC clone contains the entire sequence of  
511 *pvOxtr* gene (colored green), the complete intergenic sequence both upstream and  
512 downstream of *pvOxtr* gene, the 12<sup>th</sup> exon of *Rad18* (colored blue) and the 2<sup>nd</sup> exon of  
513 *Cav3* (colored purple). The yellow arrows indicate the direction of transcription. (C)  
514 Schematic diagram of the strategy to generate Koi mice. The P2A-NLS-Cre-Frt-Amp-Frt  
515 cassette was inserted in-frame right before the stop codon of *Oxtr*. And the ampicillin  
516 selection marker was deleted by 706-Flpe. PCR primers for verifying the targeted alleles  
517 are shown as red arrows. (D) Two correctly modified vector clones were verified by  
518 using PCR with p2 and p8. (E) Koi lines were verified by 5 pairs of primers. From Lane1  
519 to Lane8 are 100bp marker, p3+p7, p2+p6, p2+p7, p4+p8, p2+p8, blank and 1kb marker.

520

521 **Fig.2 Transgenic CRE mediated Lac-Z reporter gene expression in the brain and**  
522 **mammary gland of Koi lines.** X-gal staining of the brains and mammary glands are  
523 from the double positive (*Cre+*, *LacZ+*) offspring from Koi-1 (A, F, K, P), Koi-2 (B, G,  
524 L, Q), Koi-3 (G, H, M, R), Koi-4 (D, I, N, S) and *mOxtr-Ires-Cre* knock-in line (E, J, O,  
525 T). U, V, M, X, Y are the magnified images of the areas within the yellow-border squares  
526 from D, N, E, J, O, respectively, to show the distribution of low-density Lac-Z positive  
527 cells in these areas. Scale bar=1mm (A-O), 500um (P-T) and 200um (U-Y). (Z) The  
528 estimated copy number of transgene of all Koi lines. See Supplementary Figure 2 for  
529 images of Koi-5-8 lines. PFC=prefrontal cortex, LS=lateral septum, BLA=basolateral  
530 amygdala, VMH=ventromedial nucleus of the hypothalamus, Tha=thalamus.

531  
532 **Fig.3 The expression of OXTR in adult brain of Koi lines.** Autoradiographs illustrate  
533 the distribution of OXTR binding in adult WT (A-C), Koi-1 (D-F), Koi-2 (G-I), Koi-3 (J-  
534 L), and Koi-4 (M-O). PFC=prefrontal cortex, LS=lateral septum, BLA=basolateral  
535 amygdala, VMH=ventromedial nucleus of the hypothalamus, Tha=thalamus. Scale  
536 bar=1mm.

537  
538 **Fig.4 Social behaviors of Koi lines.** (A) Illustration of the partner preference test (PPT)  
539 paradigm. The experimental mouse was placed in a chamber with an automatic  
540 monitoring system, where it could freely explore two pen-boxes localized in two diagonal  
541 corners. Habituation phase: two pen-boxes are empty. Recognition phase: a stimulating  
542 partner mouse is placed into one pen-box and a stimulating stranger mouse is placed in  
543 the other one. Preference phase: The positions of two stimulating mice are switched. (B)  
544 Representative traces of one experimental mouse during the three phases. (C-E) The stay  
545 time in the surrounding area of each pen box during three phases;(C) Habituation  
546 phase;(D) Recognition phase; (E) Preference phase. Samples sizes for the PPT are WT  
547 (n=12), Koi-1 (n=14), Koi-2 (n=13) Koi-3 (n=12) Koi-4 (n=14). All the experimental  
548 mice are female. (F) The illustration of the procedure of the maternal behavior test. (G)  
549 Pup retrieval latency and (H) crouching time were recorded and analyzed. Sample sizes  
550 for the maternal behavior tests are WT (n=15), Koi-3 (n=18), Koi-4 (n=18). Significance  
551 of interaction between independent factors: #  $p < 0.05$ ; ##  $p < 0.01$ . Significance of main  
552 effect or single main effect of genotype: \*  $p < 0.05$ ; \* \*  $p < 0.01$ ; \* \* \*  $p < 0.001$ ; \* \* \*  
553 \*  $p < 0.0001$ . (Illustrations created with Biorender.com)

554

## 555 **Star Methods**

556 ***pvOxtr-P2A-Cre* BAC vector construction.**

557 The vole BAC clone (GeneBank: DP001214.1) containing the *Oxtr* locus was obtained  
558 from a prairie vole BAC library (CHORI-232) [31, 32]. This BAC clone carries the entire  
559 *pvOxtr* locus with the full intergenic sequence upstream of 5' of *pvOxtr* (150kb) and  
560 downstream of coding region of *pvOxtr* (9kb). The NLS (nuclear localization signal)-  
561 Cre-Frt-Amp-Frt cassette was obtained from Dr. Takuji Iwasato, and was slightly  
562 modified to introduce a P2A sequence [71]. The P2A sequence was introduced using  
563 PCR with the following primers:

564 fw5'- ATGGGAAGCGGAGCTACTAACTTCAGCCTGCTGAAGCAGGCTGGAGA

565 CGTGGAGGAGAACCCTGGACCTCTCGAAACTGACAGGAGAACCACC-3';

566 rv5'-AGACTGGAGTCCGCATAGCCCCCTCCCCGCCCCAGGCGCGGTGGGCC

567 AGGCAGGTGGCTCACCTTGACCAAGTTGCTGAAGTTCCTATTCC-3'. The P2A sequence is  
568 underlined. And the resulting amplified cassette had the P2A upstream of the NLS-Cre.

569 Then the P2A-NLS-Cre-Frt-Amp-Frt cassette was inserted in-frame right before the stop  
570 codon of *Oxtr* in the BAC clone using the Red/ET Recombineering kit (Gene Bridges  
571 GmbH, Heidelberg Germany) after adding homologous arms by PCR with the following  
572 primers: fw5'-CACCTTCGTCCTGAGTCGCCGAGCTCCAGCCAGAGGAGCTG

573 CTCTCAACCATCTTCAGCAATGGGAAGCGGAGCTACTAAC-3';

574 rv5'-GAGGAGAGGGATACACACCAATAGGCACCTTATACTCCACGCAC

575 GGCCACCAGGGCAGACTGGAGTCCGCATAGCC-3'. The ampicillin selection marker was  
576 deleted with the 706-Flpe-induced recombination method (Gene Bridges Heidelberg  
577 Germany). A correctly modified BAC clone was verified by using PCR at both the 5' and  
578 3' junctions of the targeted insertion with the following primer pair : fr5'-

579 GCCTTCATCATCGCCATGCTCTT-3'(p2) and rv5'-GATGGCTGAGTACTGGCATCT-3'(p8);

580 The construct was further verified by sequencing using the following 7 primers specific  
581 either for BAC vector or the p2A-NLS-Cre fragment:

582 5'- CCTGCAGCCAACTGGAGCTTC-3'(p1); 5'- CTTCCTTGGGCGCATTGACGTC-3'(p5);

583 5'-TACCTGTTTTGCCGGGTCAG-3(p4) ; 5'-GCCTTCATCATCGCCATGCTCTT-3'(p2) ;

584 5'-CTGACCCGGCAAACAGGTA-3'(p7) ; 5'-TCCGTTATTCAACTTGCACCATGC-3'(p6);

585 5'-GATGGCTGAGTACTGGCATCT-3'(p8).

586

## 587 **Animals.**

588 ***pvOxtr-P2A-Cre* BAC transgenic mouse lines (Koi lines).** *pvOxtr-P2A-Cre* BAC vector  
589 was digested with NotI for linearization and to remove the pTARBAC vector backbone.

590 The *Vole-Oxtr-P2A-Cre* BAC linearized fragment was purified using CL-4B sepharose

591 (Sigma-Aldrich), and injected into pronuclei of C57BL/6J zygotes. Mice carrying the  
592 BAC transgene were identified and confirmed using PCR with 5 pairs of primers: fr5'-  
593 TCGACCAGGTTTCGTTCACTC-3'(p3) + p7; p2+ p6; p2 +p7; p4 +p8; p2+p8. 8 lines (Koi-1~Koi-  
594 8) were confirmed with successful transgene inheritance. These lines were maintained on  
595 a congenic C57BL/6J background by backcrossing with wildtype C57BL/6J for  
596 assessments of BAC DNA copy numbers and initial transgene expression analysis.  
597 The ***ROSA-26-NLS-LacZ*** mouse line [33] was obtained from Itohara Lab at RIKEN.  
598 The ***mOxtr-Ires-Cre knock-in*** [72] and ***mOxtr<sup>-/-</sup> mutant*** [73] lines were obtained from  
599 Dr. Katsuhiko Nishimori at Tohoku University, and both were backcrossed with  
600 C57BL/6J for more than 10 generations. Each Koi line and *mOxtr-Ires-Cre* knock-in  
601 mice were crossed with *ROSA-26-NLS-LacZ* mice to generate Cre<sup>+</sup>, LacZ<sup>+</sup> double  
602 positive mice for further gene expression analysis. Koi mice were then crossed with *Oxtr*  
603 <sup>-/-</sup> to generate mice in which the pVOXTR was expressed while endogenous mOXTR was  
604 absent, and these mice were used for autoradiography, qRT-PCR and behavioral tests. All  
605 mice were generated using continuously housed breeder pairs and P21 as the standard  
606 weaning date. All the animal procedures were approved by University of Tsukuba Animal  
607 Care and Use Committee. Mice were housed under constant temperature and light  
608 condition (12 h light and 12 h dark cycle), and received food and water ad libitum.

609

#### 610 **Determination of transgene copy number**

611 Custom Taqman® MGB probes were synthesized by oligoJp (Thermo Fisher, Japan) for  
612 detecting the transgenic *Cre* and the mouse *Jun* gene (internal control). The following  
613 primer pairs and probes were used: for the *Cre* assay, fr5'-  
614 ATGACTGGGCACAACAGACAAT-3'; rv5'- CGCTGACAGCCGGAACAC-3'; probe:  
615 5'-FAM- AAACATGCTTCATCGTCGGTC CGG-MGB-3'; for *Jun* assay, fr5'-  
616 GAGTGCTAGCGGAGTCTTAACC-3'; rv5'-CTCCAGACGGCAGTGCTT-3'; probe:  
617 5'-VIC-CTGAGCCCTCCTCCCC-MGB-3'. Real-time PCR was performed using an  
618 Applied Biosystem7500. Transgene copy number was determined through absolute  
619 quantification (standard curve method) following the protocol described in [38]. Briefly,  
620 2 microliters (20 ng) of genomic DNA samples or copy number standards were analyzed  
621 in a 20µL reaction volume with two primer-probe sets (*Cre*, *Jun*). The data from  
622 transgenic samples were then compared to a standard curve of calibrator samples that are  
623 generated by diluting purified BAC DNA (linearized) over a range of known  
624 concentrations into wild-type mouse genomic DNA. In addition, no-template controls  
625 were included in each experiment. All reactions were performed in triplicate.

626

## 627 **Histology**

628 Adult mice (3-4month old), 4 male and 4 female from each line/ generation were  
629 analyzed for 3 generations. Mice were perfused intracardially with 4% formalin in 0.1M  
630 sodium phosphate buffer. Brains were embedded in 2% agarose in 0.1M PB and cut into  
631 100- $\mu$ m-thick sections with a Micro-slicer (Dosaka, Kyoto, Japan). Mammary glands were  
632 isolated from virgin female mice (2month old), 2 mice/each line were analyzed. The brain  
633 slices and whole mount mammary glands preparation were stained in X-gal solution (5  
634 mM K<sub>3</sub>Fe(CN)<sub>6</sub>, 5mM K<sub>4</sub>Fe(CN)<sub>6</sub>, 2mM MgCl<sub>2</sub>, 0.02% NP-40, 0.01% Na-deoxycholate, 1  
635 mg/ml X-gal in 0.1M PB) at 37°C for 6 hours and then were stained with hematoxylin.  
636 All experiments were done with positive and negative controls (Cre<sup>+</sup>, LacZ<sup>-</sup>) to monitor  
637 the reliability of the X-gal staining. Images were caught by Nanozoomer 2.0-HT slide  
638 scanner (Hamamatsu Photonics).

639

## 640 **3D chromatin verification on Hi-C datasets of humans and mice**

641 The 3D genome structure tracks were obtained from 4DNucleome Consortium  
642 (<https://www.4dnucleome.org/>) where datasets were systematically reanalyzed following  
643 recommended standard protocols. The datasets IDs and sample information are provided  
644 in the supplementary material (Supplementary Table1,2). 3D Genome Browser[74] and  
645 WashU Epigenome Browser[75] were employed for visualizations.

646

## 647 **Receptor Autoradiography**

648 OXTR autoradiography was performed as previously described [36]. Briefly, freshly  
649 frozen brains were stored at -80°C. Coronal sections were cut in a cryostat and 20  $\mu$ m  
650 sections were collected and then stored at -80°C until use in autoradiography. Brain  
651 sections were removed from -80°C storage and air dried, and then fixed for two minutes  
652 with 0.1% paraformaldehyde in PBS at room temperature, and rinsed twice in 50  
653 mM Tris buffer, pH 7.4, to remove endogenous OT. They were then incubated in 50 pM  
654 <sup>125</sup>I-OVTA (2200 Ci/mmol; PerkinElmer; Boston, MA), a selective, radiolabeled OXTR  
655 ligand, for one hour. Unbound <sup>125</sup>I-OVTA was then washed away with Tris-MgCl<sub>2</sub>  
656 buffer (50 mM Tris plus 2% MgCl<sub>2</sub>, pH 7.4) and sections were air dried. Sections were  
657 exposed to BioMax MR film (Kodak; Rochester, New York) for five days. Digital images  
658 were obtained with a light box and a Cannon camera (Cannon 6D MarkII, Japan). The  
659 brightness and contrast of representative images were equally adjusted for all  
660 autoradiography images within a panel using Adobe Photoshop.

661

662 **Quantification of *Oxtr* mRNA expression by qRT-PCR**

663 Real-time quantitative polymerase chain reaction (RT-qPCR) using an Applied  
664 Biosystems 7500 Real-Time PCR system was used to quantify *Oxtr* mRNA expression  
665 levels in different brain regions of Koi lines. Total RNA of different brain regions was  
666 isolated using the RNeasy extraction kit (Qiagen, Germantown, US), and cDNA was  
667 synthesized after Deoxyribonuclease I (Invitrogen, Waltham, US) treatment by using  
668 EvoScript Universal cDNA Master (Roche, Penzberg, Germany), and then quantitative  
669 RT-PCR was performed with FastStart Universal SYBR Green Master (Roche, Penzberg,  
670 Germany). The relative standard curve method was used to obtain the relative quantities  
671 of *Oxtr* expression following the manual of Applied Biosystems. To allow the  
672 comparison between Koi lines and WT mice, the following primer pair (which can detect  
673 the expression of both *mOxtr* and *pvOxtr*) was used: fr5'-  
674 GCCTTTCTTCTTCGTGCAGATG-3' and rv5'-ATGTAGATCCAGGGGTTGCAG-3' In  
675 addition, to specifically detect the expression of *pvOxtr*, the primer pair fr5'-  
676 GCCTTTCTTCTTCGTGCAGATG-3 and rv5'-AAAGAGGTGGCCCGTGAAC-3' was  
677 used in the 2<sup>nd</sup> qRT-PCR experiment. GAPDH was used as the endogenous control for  
678 both experiments and was amplified by the following primer pair: fr5'-  
679 GGGTTCCTATAAATACGGACTGC-3' and rv5'- CCATTTTGTCTACGGGACGA-3'.

680 Samples were analyzed in triplicates. A non-template control was performed to ensure  
681 that there was no amplification of genomic DNA. All of the experimenters were blind to  
682 the genotype of the subjects.

683

684 **Partner preference test (PPT)**

685 Subjects were housed with 4 age-matched and same-sex littermates until testing at  
686 adulthood (2-5 months old). 12-14 homozygous? mice were tested for each group.  
687 Ovariectomized females were paired and cohoused with a sexually experienced adult  
688 wildtype male for 21 days before PPT test. The female was injected with estradiol  
689 benzoate (10 µg and 5 µg at 48 h and 24 h before induced mating) and progesterone (500  
690 µg at 4–7 h before induced mating) to ensure high sexual receptivity before mating.  
691 Mating was induced on Day 2,9 and16. PPT data was analyzed using TimeSSII for social  
692 interaction test system (O' Hara & Co., Ltd.). Briefly, the experimental subject was  
693 placed in a chamber, in which two pen-boxes (diameter 8cm, height10cm) were located at  
694 two diagonally opposite corners. The experimental animal was free to move throughout  
695 the chamber and the time spent in close proximity to each pen-box (stay time) is recorded



696 using an automated mouse tracking system (Fig.4 A, B). In the habituation phase, the  
697 experimental subject was allowed to explore the chamber for 5 minutes with both pen-  
698 boxes empty. In the recognition phase, the partner stimulus animal was restricted in one  
699 pen-box, and a novel “stranger” stimulus animal was restricted in another pen-box, and  
700 the experimental subject was allowed to explore the chamber for 10 minutes. In the  
701 preference phase, the positions of the partner stimulus animal and the “stranger” stimulus  
702 animal were switched, and the experimental subject was allowed to explore the chamber  
703 for 20 minutes. To assure unbiased design, pen-box assignments were counterbalanced  
704 for the diagonal positions. All of the experimenters were blind to the genotype of the  
705 subjects.

706  
707  
708

### 709 **Parental behavior test**

710 To examine maternal behavior, we performed pup retrieval test with virgin female mice  
711 (2- to 4-months old, 15-18mice/line), following the method described in [76] with some  
712 modifications. Briefly, 5 days prior to the behavioral testing, each subject was isolated  
713 and housed in separate home cages in the test room. Nesting material (about 1.5 g of  
714 cotton wool) was provided for nest making. The tests were conducted in the dark phase of  
715 light/dark cycle (12 hours/12 hours). On the day of the test, each subject was placed in  
716 the recording area and allowed 15 minutes for habituation. The stimulus pups (age: P2-  
717 P3) were collected from a group of donor mothers immediately before the start of the  
718 experiment. A retrieval test began with the placement of 3 stimulus pups on the side  
719 farthest from the nest, and the female’s behavior was recorded by an ARNAN 4 channel  
720 security system for 15 minutes. Pup retrieval was defined as picking up the pup and  
721 bringing it to the nest. If the subject did not complete the retrieval for 3 pups in 15  
722 minutes, the video recording time was extended to 30 minutes. The latency to retrieve  
723 each pup (1st, 2nd, 3rd) and the time spent crouching on the pups were time-stamped and  
724 calculated manually. A latency of 1800 seconds was assigned if the pup-retrieval was not  
725 completed in 30 minutes. Crouching was defined as the mouse supporting itself in a  
726 lactation-position over the pups in the nest. Crouching time on a single pup, two pups,  
727 and three pups were summed up as total crouching time. All of the  
728 experimenters were blind to the genotype of the subjects.

729

### 730 **Statistical analysis**

731 All the statistical analyses were performed by SPSS21(IBM). Mixed ANOVA was used  
732 for analyzing PPT data and pup retrieval data. Mauchly's test of sphericity was used to  
733 test whether or not the assumption of sphericity was met in repeated  
734 measures. Greenhouse-Geisser correction was applied when the sphericity was violated.  
735 Two-way ANOVA was used for analyzing qRT-PCR region specific data across different  
736 mouse lines. One-way ANOVA was used for analyzing crouching time in the parental  
737 behavioral test. If there was a significant main effect of an independent factor, post hoc  
738 test was used to do multiple comparisons. If there was a significant interaction between  
739 within-subject factor and between-subject factor, post hoc pairwise comparisons were  
740 applied to analyze the simple main effects. Bonferroni correction was used for all the post  
741 hoc tests.

742

#### 743 **Supplemental information titles and legends:**

744 **Supplementary Fig.1 Transgenic CRE mediated Lac-Z reporter gene expression in**

745 **the brain of Koi lines.** X-gal staining of the brains from the double positive (*Cre+*,  
746 *LacZ+*) offspring of Koi-5 (A-C), Koi-6 (D-F), Koi-7 (G-I), Koi-8 (J-L). Scale=1mm

747

748 **Supplementary Fig.2 Negative control of whole-mount mammary gland staining.**

749 X-gal staining of a mammary gland from (*Cre-*, *LacZ+*) offspring from heterozygous Koi-  
750 4 was shown. The lymph node showed some blue signal, indicating that the lymph node  
751 could be stained nonspecifically. All the epithelium ducts did not show any blue signal,  
752 verifying the specificity of duct labeling of X-gal staining. Scale=500um

753

754 **Supplementary Fig.3 Heatmap of the chromatin contacts surrounding *Oxtr* and *Oxt***

755 **across mouse tissues/cells from megabase-size visualization.** (A) Heatmap of the  
756 chromatin contacts surrounding *Oxtr* across mouse tissues/cells: *Oxtr* is located at a TAD  
757 boundary region. The increase of interactions characterizes the TADs structure and the  
758 interaction of two neighboring TADs can be more clearly observed in brain-related  
759 samples. Blue dashed lines were prepared to help observing the TAD structures, and  
760 black circles were prepared to help observing the long-distance interaction obtained from  
761 Hi-C interaction matrices surrounding *Oxtr*. (B) Heatmap of the chromatin contacts  
762 surrounding *Oxt* across mouse tissues/cells. No TAD structure was observed surrounding  
763 *Oxt* locus.

764

765 **Supplementary Fig.4 Heatmap of the chromatin contacts surrounding *OXTR* and**

766 ***OXT* across human tissues/cells from megabase-size visualization.**

767 (A) Heatmap of the chromatin contacts surrounding *OXTR* across human tissues/cells.  
768 The human *OXTR* is also located at a TAD boundary region. Blue dashed lines were  
769 prepared to help observing the large TAD structure obtained from Hi-C interaction  
770 matrices. (B) Heatmap of the chromatin contacts surrounding *OXT* across human  
771 tissues/cells. No typical TAD structure was observed surrounding *OXT* locus.

772

773 **Supplementary Fig.5 Quantitative PCR analysis of *Oxtr* mRNA expression in**  
774 **different brain regions revealed by common primer set recognizing both *mOxtr* and**  
775 ***pvOxtr*. qPCR was used to analyzed *Oxtr* mRNA in olfactory bulb, prefrontal cortex,**  
776 **striatum and thalamus from WT, Koi-1, Koi-2, Koi-3, Koi-4 and *mOxtr*<sup>-/-</sup> mutant mice,**  
777 **n=4 for each genotype. Note that the level of *Oxtr* mRNA in *mOxtr*<sup>-/-</sup> mutant mice was**  
778 **nondetectable (ND). The autoradiograph of OXTR binding in olfactory bulb from each**  
779 **line were shown alongside the legend. There was a significant interaction between**  
780 **position and genotype F (12,64) =26.33, p<0.0001; Post hoc Bonferroni test revealed that**  
781 ***Oxtr* expression level in olfactory bulb of Koi-1 was significantly higher than that of**  
782 **other genotype groups (p<0.0001 for all), and that of Koi-4 was significantly higher than**  
783 **that of Koi-3 p<0.05. And the striatum of Koi-4 expressed significantly higher *Oxtr* when**  
784 **compared with WT and Koi-3(p<0.05 for both). The *Oxtr* expression level in thalamus of**  
785 **Koi-4 was significantly higher than other genotype groups (p<0.0001 when compared**  
786 **with WT and Koi-3, p<0.001 when compared with Koi-2, p<0.05 when comparedg with**  
787 **Koi-1.) Significance of interaction between genotype and brain region: # # # # p<0.0001.**  
788 **The significance of single main effect of genotype: \* p<0.05; \* \* p<0.01; \* \* \***  
789 **p<0.001; \* \* \* \* p<0.0001.**

790

791 **Supplementary Fig.6 Quantitative analysis of *Oxtr* mRNA expression in different**  
792 **brain regions revealed by a primer set specifically recognizing *pvOxtr*. The tissue of**  
793 **olfactory bulb, prefrontal cortex, striatum and thalamus from WT, Koi-1, Koi-2, Koi-3**  
794 **and Koi-4 mice were analyzed, n=4 for each genotype. Note that the level of *Oxtr***  
795 **mRNA in WT mice was barely detectable. There was a significant interaction between**  
796 **position and genotype F (9,48) =89.25, p<0.0001; Post Hoc Bonferroni test revealed that**  
797 ***Oxtr* expression level in the olfactory bulb of Koi-1 was significantly higher than that of**  
798 **other genotype groups (p<0.0001 for all), and that of Koi-4 was significantly higher than**  
799 **that of Koi-2 and Koi-3 (p<0.0001 for both). The *Oxtr* expression level in prefrontal**  
800 **cortex of Koi-3 was significantly higher than that of other groups (p<0.01 when**  
801 **comparing with Koi-1 and Koi-4; p<0.05 when comparing with Koi-2). And the striatum**  
802 **of Koi-4 expressed significantly higher *Oxtr* when comparing with Koi-2 and Koi-3**

803 (p<0.01 for both). The *Oxtr* expression level in thalamus of Koi-4 was significantly  
804 higher than that of other genotype groups (p<0.0001 for all). The significance of  
805 interaction between genotype and brain region: ### p<0.0001. The significance of  
806 single main effect of genotype: \* p<0.05; \*\* p<0.01; \*\*\* p<0.001; \*\*\*\*  
807 p<0.0001.

808

### 809 **Supplementary Table.1**

#### 810 **The datasets IDs and sample information for mouse 3D chromatin verification**

811 The database source of each mouse sample, analysis and visualization tool information,  
812 and the region analyzed was listed.

### 813 **Supplementary Table.2**

#### 814 **The datasets IDs and sample information for human 3D chromatin verification**

815 The database source of each human sample, analysis and visualization tool information,  
816 and the region analyzed was listed.

817

818

### 819 **References:**

- 820 1. Jurek, B., and Neumann, I.D. (2018). The Oxytocin Receptor: From Intracellular  
821 Signaling to Behavior. *Physiol Rev* *98*, 1805-1908.
- 822 2. Froemke, R.C., and Young, L.J. (2021). Oxytocin, Neural Plasticity, and Social Behavior.  
823 *Annu Rev Neurosci* *44*, 359-381.
- 824 3. Rigney, N., de Vries, G.J., Petrusis, A., and Young, L.J. (2022). Oxytocin, Vasopressin,  
825 and Social Behavior: From Neural Circuits to Clinical Opportunities. *Endocrinology* *163*.
- 826 4. Young, L.J., and Zhang, Q.I. (2021). On the Origins of Diversity in Social Behavior. *The*  
827 *Japanese Journal of Animal Psychology* doi: 10.2502/janip.71.1.4.
- 828 5. Barrett, C.E., Arambula, S.E., and Young, L.J. (2015). The oxytocin system promotes  
829 resilience to the effects of neonatal isolation on adult social attachment in female prairie  
830 voles. *Transl Psychiatry* *5*, e606.
- 831 6. Ahern, T.H., Olsen, S., Tudino, R., and Beery, A.K. (2021). Natural variation in the  
832 oxytocin receptor gene and rearing interact to influence reproductive and nonreproductive  
833 social behavior and receptor binding. *Psychoneuroendocrinology* *128*, 105209.
- 834 7. Ross, H.E., Freeman, S.M., Spiegel, L.L., Ren, X., Terwilliger, E.F., and Young, L.J.  
835 (2009). Variation in oxytocin receptor density in the nucleus accumbens has differential  
836 effects on affiliative behaviors in monogamous and polygamous voles. *J Neurosci* *29*, 1312-  
837 1318.

- 838 8. King, L.B., Walum, H., Inoue, K., Eyrich, N.W., and Young, L.J. (2016). Variation in the  
839 Oxytocin Receptor Gene Predicts Brain Region-Specific Expression and Social  
840 Attachment. *Biol Psychiatry* *80*, 160-169.
- 841 9. Rogers Flattery, C.N., Coppeto, D.J., Inoue, K., Rilling, J.K., Preuss, T.M., and Young,  
842 L.J. (2022). Distribution of brain oxytocin and vasopressin V1a receptors in chimpanzees  
843 (Pan troglodytes): comparison with humans and other primate species. *Brain Struct Funct*  
844 *227*, 1907-1919.
- 845 10. Skuse, D.H., Lori, A., Cubells, J.F., Lee, I., Conneely, K.N., Puura, K., Lehtimäki, T.,  
846 Binder, E.B., and Young, L.J. (2014). Common polymorphism in the oxytocin receptor  
847 gene (*OXTR*) is associated with human social recognition skills. *Proceedings of*  
848 *the National Academy of Sciences* *111*, 1987-1992.
- 849 11. Theofanopoulou, C., Andirkó, A., Boeckx, C., and Jarvis, E.D. (2022). Oxytocin and  
850 vasotocin receptor variation and the evolution of human prosociality. *Comprehensive*  
851 *Psychoneuroendocrinology* *11*, 100139.
- 852 12. Keebaugh, A.C., and Young, L.J. (2011). Increasing oxytocin receptor expression in the  
853 nucleus accumbens of pre-pubertal female prairie voles enhances alloparental  
854 responsiveness and partner preference formation as adults. *Horm Behav* *60*, 498-504.
- 855 13. Keebaugh, A.C., Barrett, C.E., Laprairie, J.L., Jenkins, J.J., and Young, L.J. (2015). RNAi  
856 knockdown of oxytocin receptor in the nucleus accumbens inhibits social attachment and  
857 parental care in monogamous female prairie voles. *Soc Neurosci* *10*, 561-570.
- 858 14. Berendzen, K.M., Sharma, R., Mandujano, M.A., Wei, Y., Rogers, F.D., Simmons, T.C.,  
859 Seelke, A.M.H., Bond, J.M., Larios, R., Goodwin, N.L., et al. (2023). Oxytocin receptor is  
860 not required for social attachment in prairie voles. *Neuron* *111*, 787-796.e784.
- 861 15. Mack, K.L., Campbell, P., and Nachman, M.W. (2016). Gene regulation and speciation in  
862 house mice. *Genome Res* *26*, 451-461.
- 863 16. Osada, N., Miyagi, R., and Takahashi, A. (2017). Cis- and Trans-regulatory Effects on  
864 Gene Expression in a Natural Population of *Drosophila melanogaster*. *Genetics* *206*,  
865 2139-2148.
- 866 17. Shi, X., Ng, D.W.K., Zhang, C., Comai, L., Ye, W., and Jeffrey Chen, Z. (2012). Cis- and  
867 trans-regulatory divergence between progenitor species determines gene-expression  
868 novelty in *Arabidopsis* allopolyploids. *Nature Communications* *3*, 950.
- 869 18. Signor, S.A., and Nuzhdin, S.V. (2018). The Evolution of Gene Expression in cis and  
870 trans. *Trends Genet* *34*, 532-544.
- 871 19. Suster, M.L., Abe, G., Schouw, A., and Kawakami, K. (2011). Transposon-mediated BAC  
872 transgenesis in zebrafish. *Nature Protocols* *6*, 1998-2021.

- 873 20. Beil, J., Fairbairn, L., Pelczar, P., and Buch, T. (2012). Is BAC transgenesis obsolete?  
874 State of the art in the era of designer nucleases. *J Biomed Biotechnol* *2012*, 308414.
- 875 21. Bian, Q., and Belmont, A.S. (2010). BAC TG-EMBED: one-step method for high-level,  
876 copy-number-dependent, position-independent transgene expression. *Nucleic Acids*  
877 *Research* *38*, e127-e127.
- 878 22. Schmidt, E.F., Kus, L., Gong, S., and Heintz, N. (2013). BAC transgenic mice and the  
879 GENSAT database of engineered mouse strains. *Cold Spring Harb Protoc* *2013*.
- 880 23. Gerfen, C.R., Paletzki, R., and Heintz, N. (2013). GENSAT BAC cre-recombinase driver  
881 lines to study the functional organization of cerebral cortical and basal ganglia circuits.  
882 *Neuron* *80*, 1368-1383.
- 883 24. Heintz, N. (2004). Gene Expression Nervous System Atlas (GENSAT). *Nature*  
884 *Neuroscience* *7*, 483-483.
- 885 25. Gong, S., Doughty, M., Harbaugh, C.R., Cummins, A., Hatten, M.E., Heintz, N., and  
886 Gerfen, C.R. (2007). Targeting Cre recombinase to specific neuron populations with  
887 bacterial artificial chromosome constructs. *J Neurosci* *27*, 9817-9823.
- 888 26. Ferrante, R.J. (2009). Mouse models of Huntington's disease and methodological  
889 considerations for therapeutic trials. *Biochimica et Biophysica Acta (BBA) - Molecular*  
890 *Basis of Disease* *1792*, 506-520.
- 891 27. Shenoy, S.A., Zheng, S., Liu, W., Dai, Y., Liu, Y., Hou, Z., Mori, S., Tang, Y., Cheng, J.,  
892 Duan, W., et al. (2022). A novel and accurate full-length HTT mouse model for  
893 Huntington's disease. *Elife* *11*, e70217.
- 894 28. Crook, Z.R., and Housman, D. (2011). Huntington's disease: can mice lead the way to  
895 treatment? *Neuron* *69*, 423-435.
- 896 29. Taguchi, T., Ikuno, M., Hondo, M., Parajuli, L.K., Taguchi, K., Ueda, J., Sawamura, M.,  
897 Okuda, S., Nakanishi, E., Hara, J., et al. (2019).  $\alpha$ -Synuclein BAC transgenic mice exhibit  
898 RBD-like behaviour and hyposmia: a prodromal Parkinson's disease model. *Brain* *143*,  
899 249-265.
- 900 30. Yang, X.W., and Lu, X.-H. (2008). Chapter 19 - The Bac Transgenic Approach to Study  
901 Parkinson's Disease in Mice. In *Parkinson's Disease*, R. Nass and S. Przedborski, eds.  
902 (San Diego: Academic Press), pp. 247-268.
- 903 31. McGraw, L.A., Davis, J.K., Lowman, J.J., ten Hallers, B.F.H., Koriabine, M., Young, L.J.,  
904 de Jong, P.J., Rudd, M.K., and Thomas, J.W. (2010). Development of genomic resources  
905 for the prairie vole (*Microtus ochrogaster*): construction of a BAC library and vole-mouse  
906 comparative cytogenetic map. *BMC Genomics* *11*, 70.
- 907 32. McGraw, L.A., Davis, J.K., Thomas, P.J., Young, L.J., and Thomas, J.W. (2012). BAC-  
908 based sequencing of behaviorally-relevant genes in the prairie vole. *PLoS One* *7*, e29345.



- 909 33. Zhang, Q., Sano, C., Masuda, A., Ando, R., Tanaka, M., and Itohara, S. (2016). Netrin-G1  
910 regulates fear-like and anxiety-like behaviors in dissociable neural circuits. *Scientific*  
911 *Reports* *6*, 28750.
- 912 34. Kandasamy, L.C., Tsukamoto, M., Banov, V., Tsetsegee, S., Nagasawa, Y., Kato, M.,  
913 Matsumoto, N., Takeda, J., Itohara, S., Ogawa, S., et al. (2021). Limb-clasping, cognitive  
914 deficit and increased vulnerability to kainic acid-induced seizures in neuronal  
915 glycosylphosphatidylinositol deficiency mouse models. *Human Molecular Genetics* *30*,  
916 758-770.
- 917 35. Newmaster, K.T., Nolan, Z.T., Chon, U., Vanselow, D.J., Weit, A.R., Tabbaa, M.,  
918 Hidema, S., Nishimori, K., Hammock, E.A.D., and Kim, Y. (2020). Quantitative cellular-  
919 resolution map of the oxytocin receptor in postnatally developing mouse brains. *Nature*  
920 *Communications* *11*, 1885.
- 921 36. Inoue, K., Ford, C.L., Horie, K., and Young, L.J. (2022). Oxytocin receptors are widely  
922 distributed in the prairie vole (*Microtus ochrogaster*) brain: Relation to social behavior,  
923 genetic polymorphisms, and the dopamine system. *Journal of Comparative Neurology* *530*,  
924 2881-2900.
- 925 37. Smirnov, A., Fishman, V., Yunusova, A., Korablev, A., Serova, I., Skryabin, B.V.,  
926 Rozhdestvensky, T.S., and Battulin, N. (2019). DNA barcoding reveals that injected  
927 transgenes are predominantly processed by homologous recombination in mouse zygote.  
928 *Nucleic Acids Research* *48*, 719-735.
- 929 38. Chandler, K.J., Chandler, R.L., Broeckelmann, E.M., Hou, Y., Southard-Smith, E.M., and  
930 Mortlock, D.P. (2007). Relevance of BAC transgene copy number in mice: transgene copy  
931 number variation across multiple transgenic lines and correlations with transgene integrity  
932 and expression. *Mamm Genome* *18*, 693-708.
- 933 39. Dekker, J., Rippe, K., Dekker, M., and Kleckner, N. (2002). Capturing chromosome  
934 conformation. *Science* *295*, 1306-1311.
- 935 40. Dixon, J.R., Selvaraj, S., Yue, F., Kim, A., Li, Y., Shen, Y., Hu, M., Liu, J.S., and Ren, B.  
936 (2012). Topological domains in mammalian genomes identified by analysis of chromatin  
937 interactions. *Nature* *485*, 376-380.
- 938 41. Rajderkar, S., Barozzi, I., Zhu, Y., Hu, R., Zhang, Y., Li, B., Alcaina Caro, A., Fukuda-  
939 Yuzawa, Y., Kelman, G., Akeza, A., et al. (2023). Topologically associating domain  
940 boundaries are required for normal genome function. *Communications Biology* *6*, 435.
- 941 42. Beagan, J.A., and Phillips-Cremins, J.E. (2020). On the existence and functionality of  
942 topologically associating domains. *Nature Genetics* *52*, 8-16.
- 943 43. Lieberman-Aiden, E., van Berkum, N.L., Williams, L., Imakaev, M., Ragozy, T., Telling,  
944 A., Amit, I., Lajoie, B.R., Sabo, P.J., Dorschner, M.O., et al. (2009). Comprehensive

- 945 Mapping of Long-Range Interactions Reveals Folding Principles of the Human Genome.  
946 *Science* *326*, 289-293.
- 947 44. Gibcus, Johan H., and Dekker, J. (2013). The Hierarchy of the 3D Genome. *Molecular*  
948 *Cell* *49*, 773-782.
- 949 45. Tribollet, E., Charpak, S., Schmidt, A., Dubois-Dauphin, M., and Dreifuss, J.J. (1989).  
950 Appearance and transient expression of oxytocin receptors in fetal, infant, and  
951 peripubertal rat brain studied by autoradiography and electrophysiology. *J Neurosci* *9*,  
952 1764-1773.
- 953 46. Inoue, K., Ford, C.L., Horie, K., and Young, L.J. Oxytocin receptors are widely distributed  
954 in the prairie vole (*Microtus ochrogaster*) brain: Relation to social behavior, genetic  
955 polymorphisms, and the dopamine system. *Journal of Comparative Neurology* *n/a*.
- 956 47. Walum, H., and Young, L.J. (2018). The neural mechanisms and circuitry of the pair  
957 bond. *Nat Rev Neurosci* *19*, 643-654.
- 958 48. Olazábal, D.E., and Young, L.J. (2006). Oxytocin receptors in the nucleus accumbens  
959 facilitate "spontaneous" maternal behavior in adult female prairie voles. *Neuroscience* *141*,  
960 559-568.
- 961 49. Carcea, I., Caraballo, N.L., Marlin, B.J., Ooyama, R., Riceberg, J.S., Mendoza Navarro,  
962 J.M., Opendak, M., Diaz, V.E., Schuster, L., Alvarado Torres, M.I., et al. (2021). Oxytocin  
963 neurons enable social transmission of maternal behaviour. *Nature* *596*, 553-557.
- 964 50. Marlin, B.J., Mitre, M., D'Amour, J. A., Chao, M.V., and Froemke, R.C. (2015). Oxytocin  
965 enables maternal behaviour by balancing cortical inhibition. *Nature* *520*, 499-504.
- 966 51. Olazábal, D.E., and Young, L.J. (2006). Species and individual differences in juvenile  
967 female alloparental care are associated with oxytocin receptor density in the striatum and  
968 the lateral septum. *Horm Behav* *49*, 681-687.
- 969 52. Ophir, A.G., Gessel, A., Zheng, D.J., and Phelps, S.M. (2012). Oxytocin receptor density  
970 is associated with male mating tactics and social monogamy. *Horm Behav* *61*, 445-453.
- 971 53. Walum, H., and Young, L.J. (2018). The neural mechanisms and circuitry of the pair  
972 bond. *Nature Reviews Neuroscience* *19*, 643-654.
- 973 54. Amadei, E.A., Johnson, Z.V., Jun Kwon, Y., Shpiner, A.C., Saravanan, V., Mays, W.D.,  
974 Ryan, S.J., Walum, H., Rainnie, D.G., Young, L.J., et al. (2017). Dynamic corticostriatal  
975 activity biases social bonding in monogamous female prairie voles. *Nature* *546*, 297-301.
- 976 55. Shapiro, L.E., and Insel, T.R. (1989). Ontogeny of oxytocin receptors in rat forebrain: a  
977 quantitative study. *Synapse* *4*, 259-266.
- 978 56. Tribollet, E., Charpak, S., Schmidt, A., Dubois-Dauphin, M., and Dreifuss, J. (1989).  
979 Appearance and transient expression of oxytocin receptors in fetal, infant, and

- 980 peripubertal rat brain studied by autoradiography and electrophysiology. *The Journal of*  
981 *Neuroscience* *9*, 1764-1773.
- 982 57. Hammock, E.A., and Levitt, P. (2013). Oxytocin receptor ligand binding in embryonic  
983 tissue and postnatal brain development of the C57BL/6J mouse. *Front Behav Neurosci* *7*,  
984 195.
- 985 58. Nardou, R., Lewis, E.M., Rothhaas, R., Xu, R., Yang, A., Boyden, E., and Dölen, G.  
986 (2019). Oxytocin-dependent reopening of a social reward learning critical period with  
987 MDMA. *Nature* *569*, 116-120.
- 988 59. Hammock, E.A.D. (2015). Developmental Perspectives on Oxytocin and Vasopressin.  
989 *Neuropsychopharmacology* *40*, 24-42.
- 990 60. Young, L.J., and Crews, D. (1995). Comparative neuroendocrinology of steroid receptor  
991 gene expression and regulation: Relationship to physiology and behavior. *Trends*  
992 *Endocrinol Metab* *6*, 317-323.
- 993 61. Ross, H.E., and Young, L.J. (2009). Oxytocin and the neural mechanisms regulating social  
994 cognition and affiliative behavior. *Front Neuroendocrinol* *30*, 534-547.
- 995 62. Venkatesh, B., Si-Hoe, S.L., Murphy, D., and Brenner, S. (1997). Transgenic rats reveal  
996 functional conservation of regulatory controls between the Fugu isotocin and rat oxytocin  
997 genes. *Proc Natl Acad Sci U S A* *94*, 12462-12466.
- 998 63. Gilligan, P., Brenner, S., and Venkatesh, B. (2003). Neurone-specific expression and  
999 regulation of the pufferfish isotocin and vasotocin genes in transgenic mice. *J*  
1000 *Neuroendocrinol* *15*, 1027-1036.
- 1001 64. Knobloch, H.S., Charlet, A., Hoffmann, Lena C., Eliava, M., Khrulev, S., Cetin, Ali H.,  
1002 Osten, P., Schwarz, Martin K., Seeburg, Peter H., Stoop, R., et al. (2012). Evoked Axonal  
1003 Oxytocin Release in the Central Amygdala Attenuates Fear Response. *Neuron* *73*, 553-  
1004 566.
- 1005 65. Gong, S., Zheng, C., Doughty, M.L., Losos, K., Didkovsky, N., Schambra, U.B., Nowak,  
1006 N.J., Joyner, A., Leblanc, G., Hatten, M.E., et al. (2003). A gene expression atlas of the  
1007 central nervous system based on bacterial artificial chromosomes. *Nature* *425*, 917-925.
- 1008 66. Gawenis, L.R., Hodges, C.A., McHugh, D.R., Valerio, D.M., Miron, A., Cotton, C.U., Liu,  
1009 J., Walker, N.M., Strubberg, A.M., Gillen, A.E., et al. (2019). A BAC Transgene  
1010 Expressing Human CFTR under Control of Its Regulatory Elements Rescues Cftr  
1011 Knockout Mice. *Scientific Reports* *9*, 11828.
- 1012 67. Xiao, J.Y., Hafner, A., and Boettiger, A.N. (2021). How subtle changes in 3D structure  
1013 can create large changes in transcription. *Elife* *10*, e64320.
- 1014 68. Lee, M., Lori, A., Langford, N.A., and Rilling, J.K. (2022). Enhanced endogenous oxytocin  
1015 signaling in the brain modulates neural responses to social misalignment and promotes

- 1016 conformity in humans: A multi-locus genetic profile approach. *Psychoneuroendocrinology*  
1017 *144*, 105869.
- 1018 69. Hernandez, L.M., Lawrence, K.E., Padgaonkar, N.T., Inada, M., Hoekstra, J.N., Lowe,  
1019 J.K., Eilbott, J., Jack, A., Aylward, E., Gaab, N., et al. (2020). Imaging-genetics of sex  
1020 differences in ASD: distinct effects of OXTR variants on brain connectivity. *Transl*  
1021 *Psychiatry 10*, 82.
- 1022 70. Vietri Rudan, M., Barrington, C., Henderson, S., Ernst, C., Odom, Duncan T., Tanay, A.,  
1023 and Hadjur, S. (2015). Comparative Hi-C Reveals that CTCF Underlies Evolution of  
1024 Chromosomal Domain Architecture. *Cell Reports 10*, 1297-1309.
- 1025 71. Kim, J.H., Lee, S.R., Li, L.H., Park, H.J., Park, J.H., Lee, K.Y., Kim, M.K., Shin, B.A., and  
1026 Choi, S.Y. (2011). High cleavage efficiency of a 2A peptide derived from porcine  
1027 teschovirus-1 in human cell lines, zebrafish and mice. *PLoS One 6*, e18556.
- 1028 72. Hidema, S., Fukuda, T., Hiraoka, Y., Mizukami, H., Hayashi, R., Otsuka, A., Suzuki, S.,  
1029 Miyazaki, S., and Nishimori, K. (2016). Generation of Oxt<sub>r</sub> cDNA(HA)-Ires-Cre Mice for  
1030 Gene Expression in an Oxytocin Receptor Specific Manner. *J Cell Biochem 117*, 1099-  
1031 1111.
- 1032 73. Takayanagi, Y., Yoshida, M., Bielsky, I.F., Ross, H.E., Kawamata, M., Onaka, T.,  
1033 Yanagisawa, T., Kimura, T., Matzuk, M.M., Young, L.J., et al. (2005). Pervasive social  
1034 deficits, but normal parturition, in oxytocin receptor-deficient mice. *Proceedings of the*  
1035 *National Academy of Sciences 102*, 16096-16101.
- 1036 74. Wang, Y., Song, F., Zhang, B., Zhang, L., Xu, J., Kuang, D., Li, D., Choudhary, M.N.K.,  
1037 Li, Y., Hu, M., et al. (2018). The 3D Genome Browser: a web-based browser for  
1038 visualizing 3D genome organization and long-range chromatin interactions. *Genome Biol*  
1039 *19*, 151.
- 1040 75. Li, D., Purushotham, D., Harrison, J.K., Hsu, S., Zhuo, X., Fan, C., Liu, S., Xu, V., Chen,  
1041 S., Xu, J., et al. (2022). WashU Epigenome Browser update 2022. *Nucleic Acids Research*  
1042 *50*, W774-W781.
- 1043 76. Stolzenberg, D.S., Stevens, J.S., and Rissman, E.F. (2012). Experience-facilitated  
1044 improvements in pup retrieval; evidence for an epigenetic effect. *Horm Behav 62*, 128-  
1045 135.
- 1046

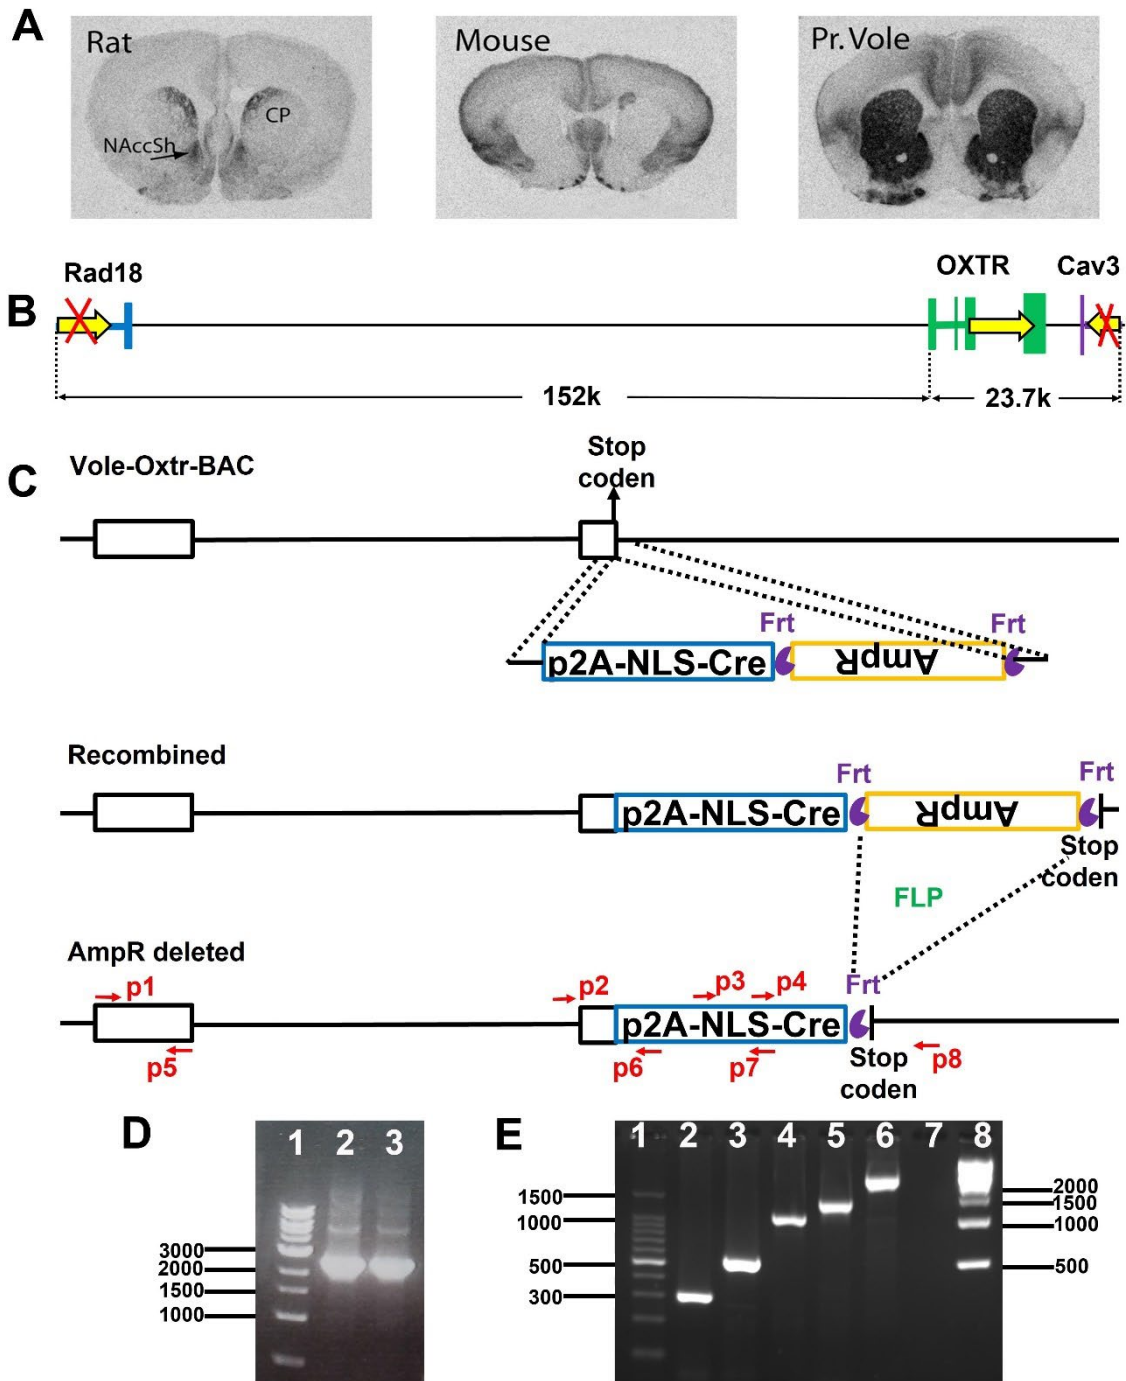

1047

1048

1049 **Fig.1 The construction of Koi lines**



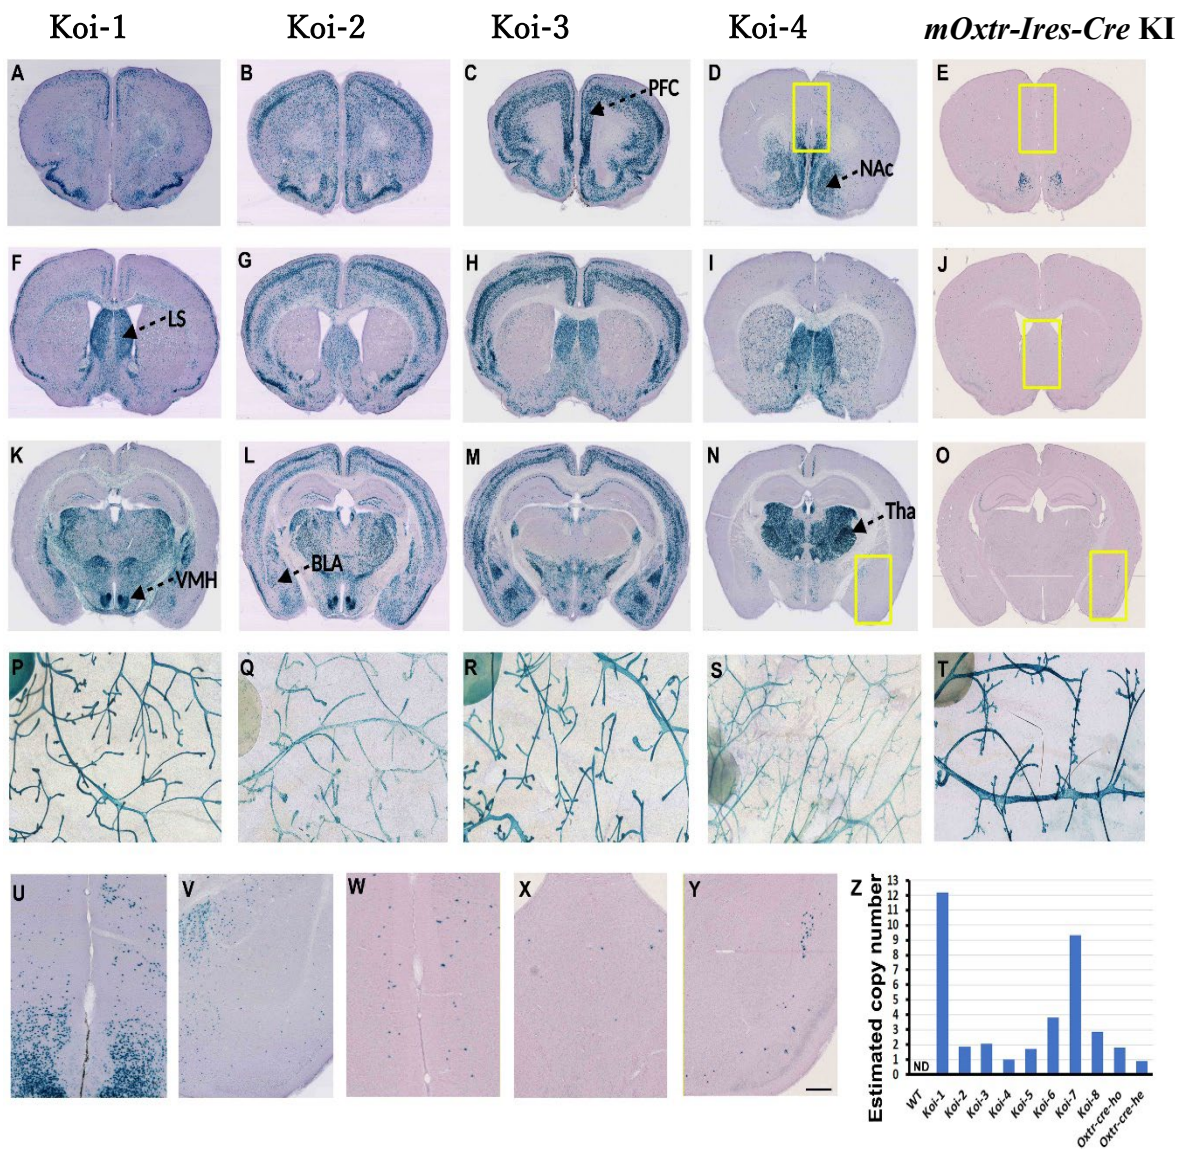

1050

1051

1052 **Fig.2 Transgenic CRE mediated Lac-Z reporter gene expression in the brain and**  
1053 **mammary gland of Koi lines.**

1054



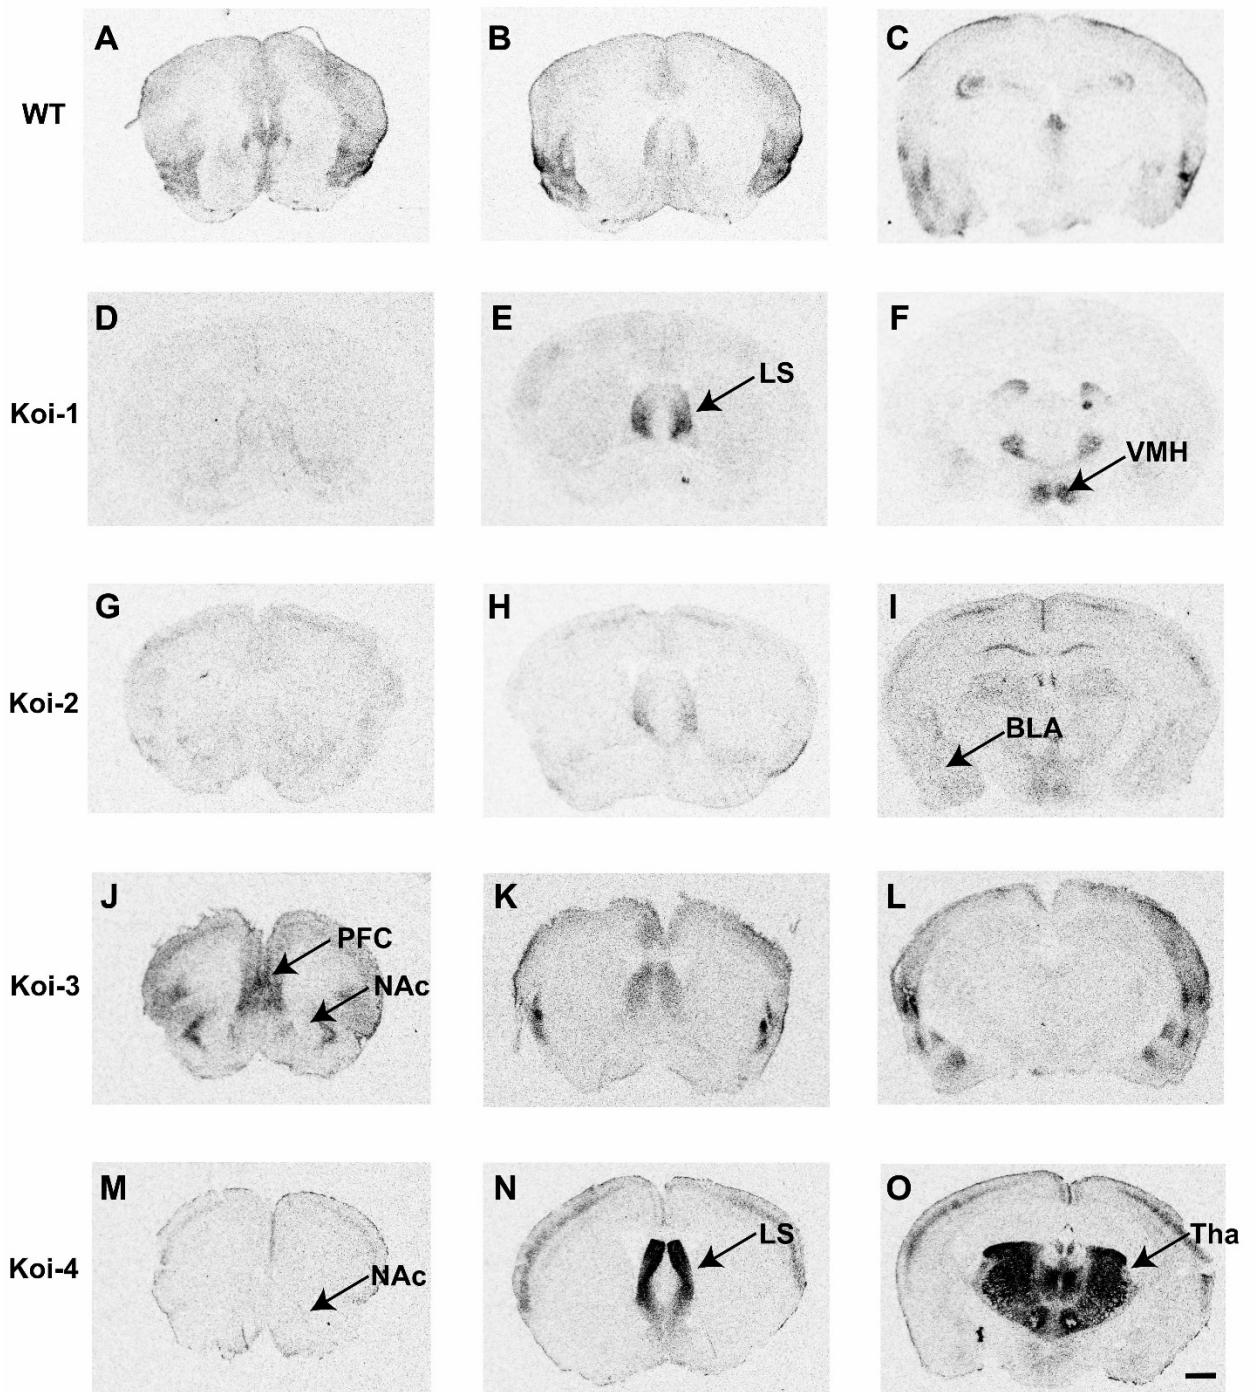

1055

1056 **Fig.3**The expression of OXTR in the brain of Koi lines.

1057

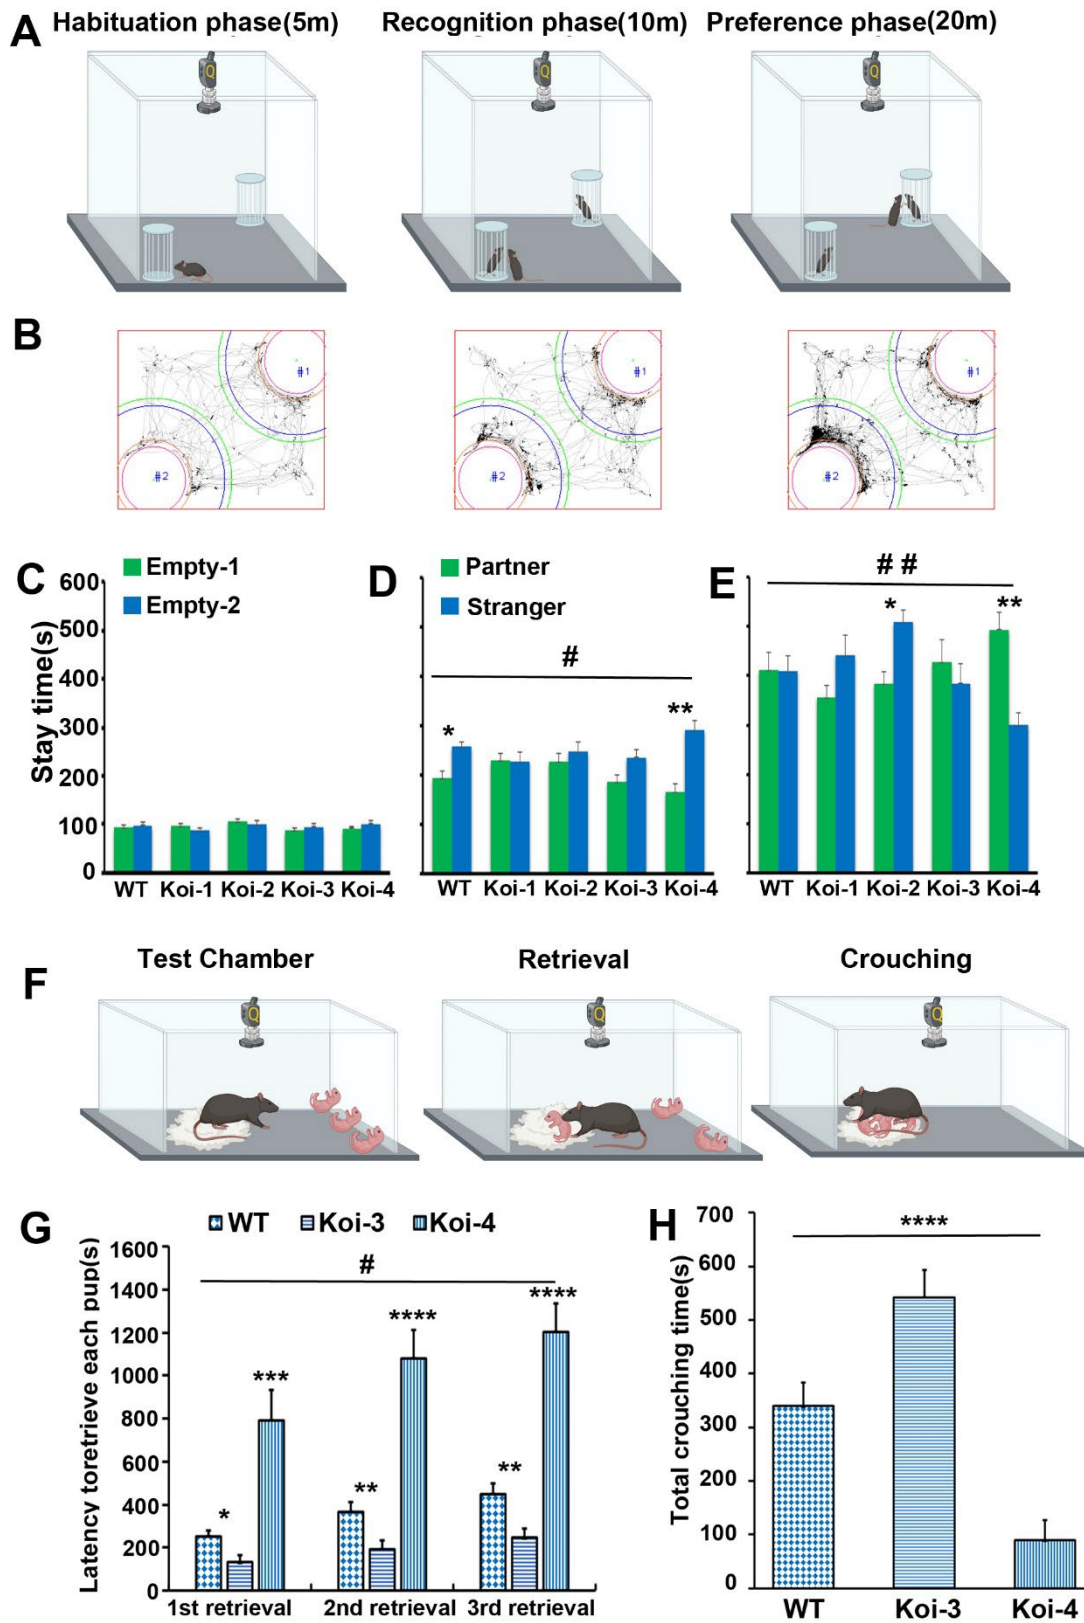

1058

1059 **Fig.4 Social behaviors of Koi lines.**



1060

1061 **Supplementary Materials:**

1062

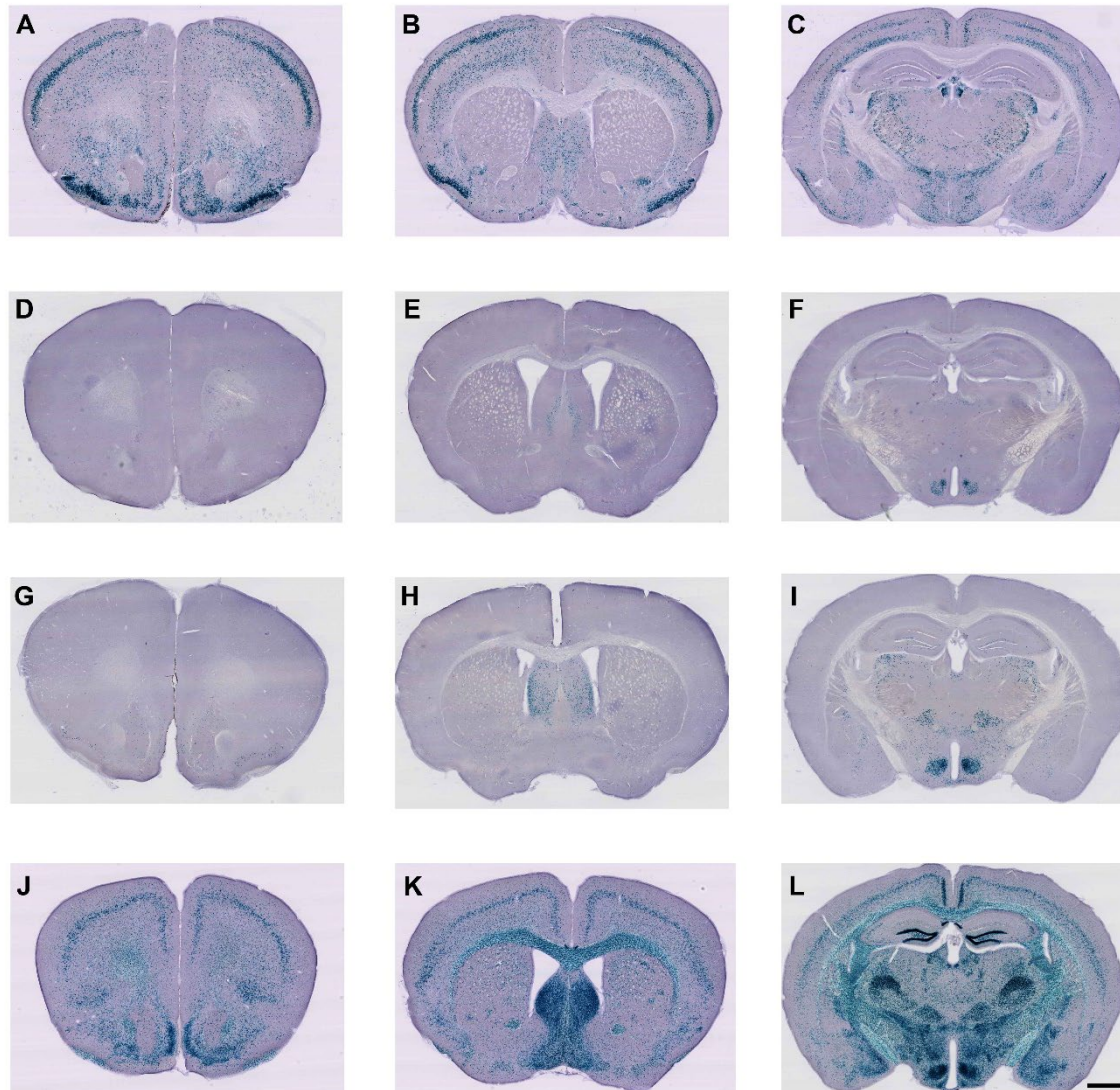

1063

1064 **Supplementary Fig.1 Transgenic CRE mediated Lac-Z reporter gene expression in**  
1065 **the brain of Koi lines.**

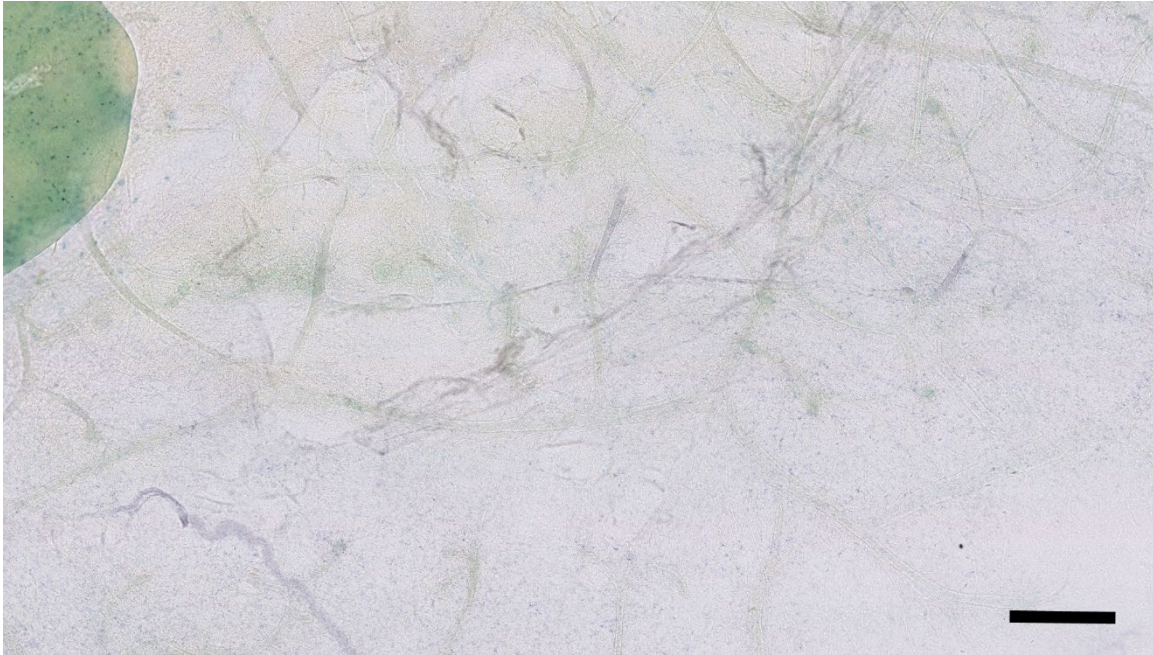

1066

1067 **Supplementary Fig.2 Negative control of whole-mount mammary gland staining.**

1068

1069

1070

1071

1072

1073

1074

1075

1076

1077

1078

1079

1080

1081

1082

1083

1084

1085

1086

1087

1088



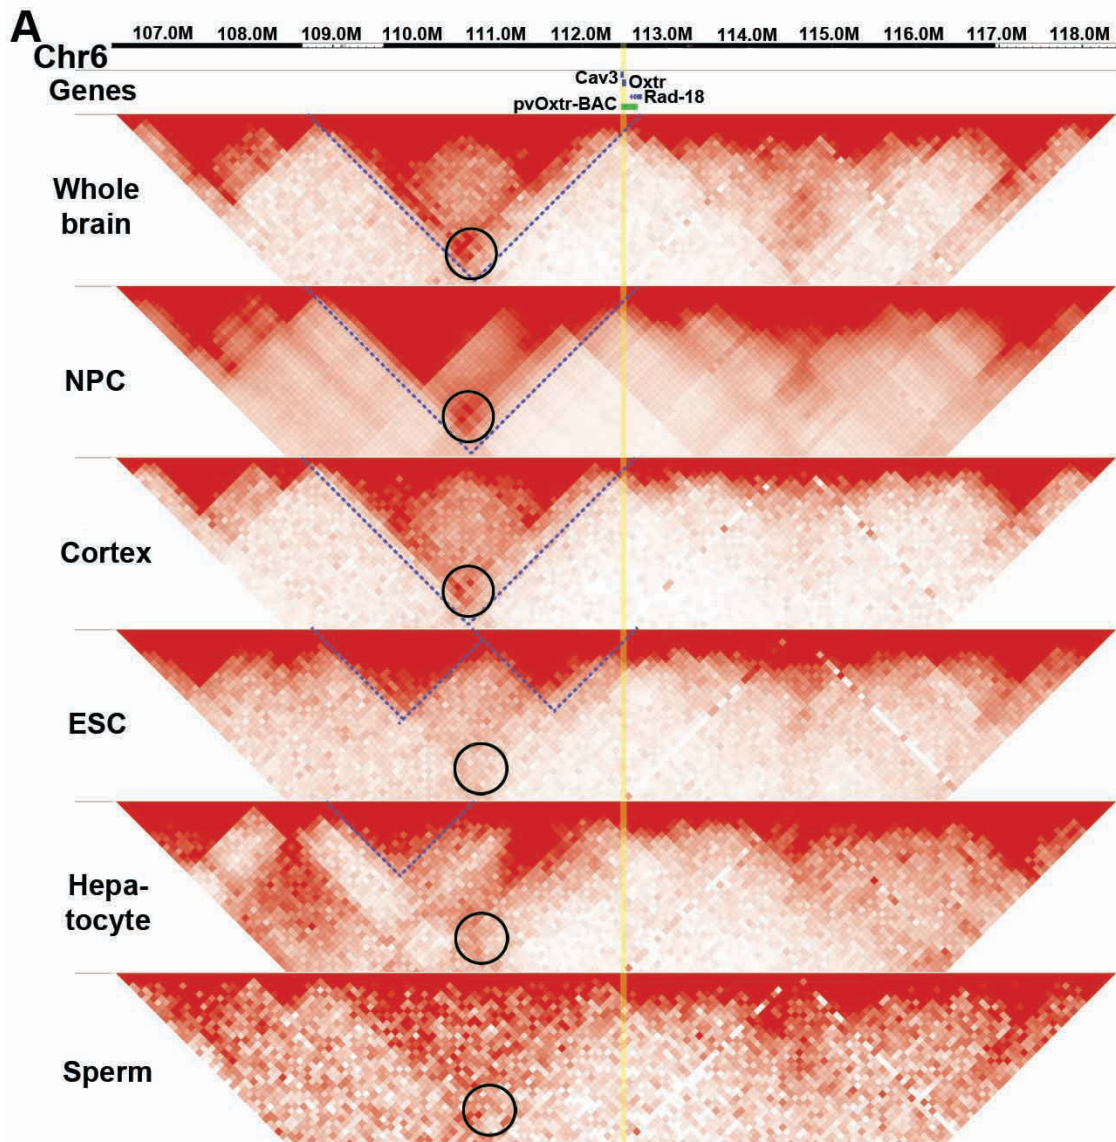

1089

1090

1091

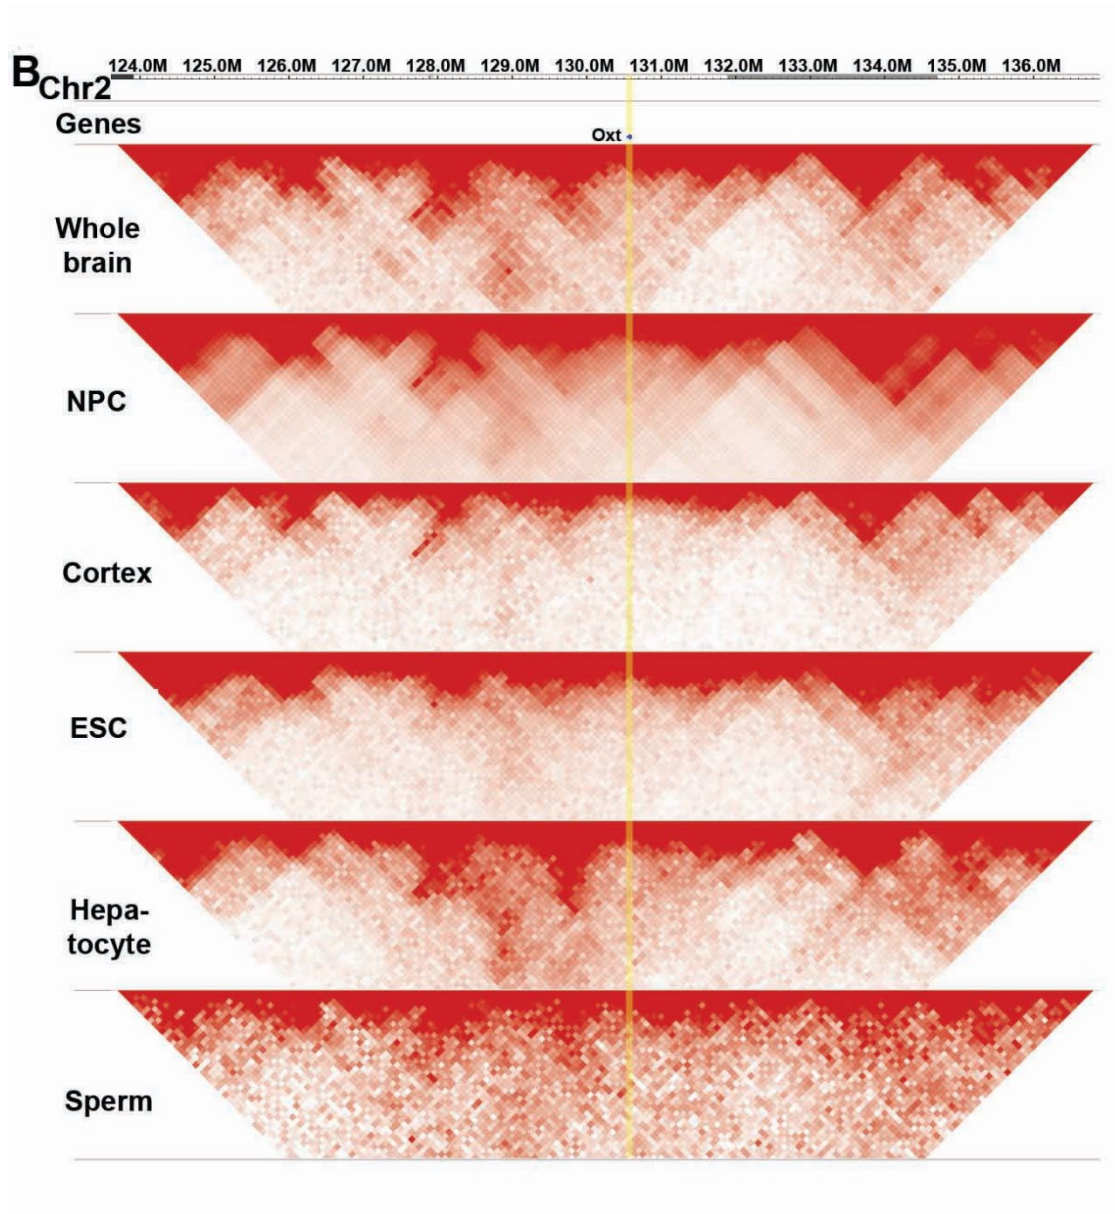

1092

1093

1094

1095 **Supplementary Fig.3 Heatmap of the chromatin contacts surrounding *Oxtr* (A) and**

1096 ***Oxt* (B) across mouse tissues/cells from megabase-size visualization.**

1097

1098

1099

1100



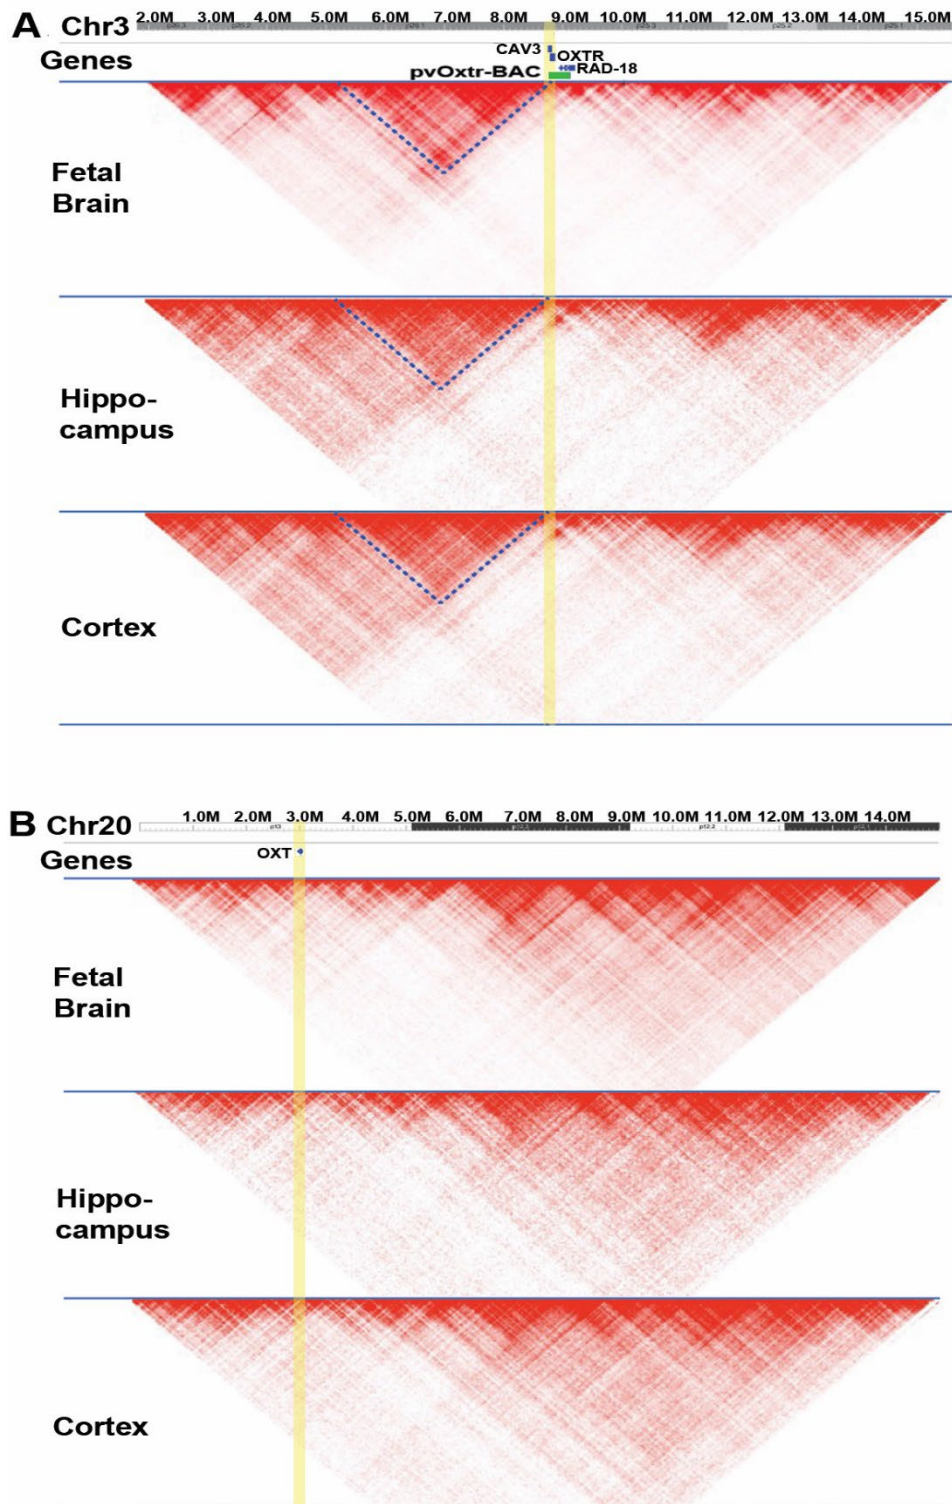

1101

1102

1103 **Supplementary Fig.4 Heatmap of the chromatin contacts surrounding *OXTR* (C)**

1104 **and *OXT* (D) across human tissues from megabase-size visualization.**

1105

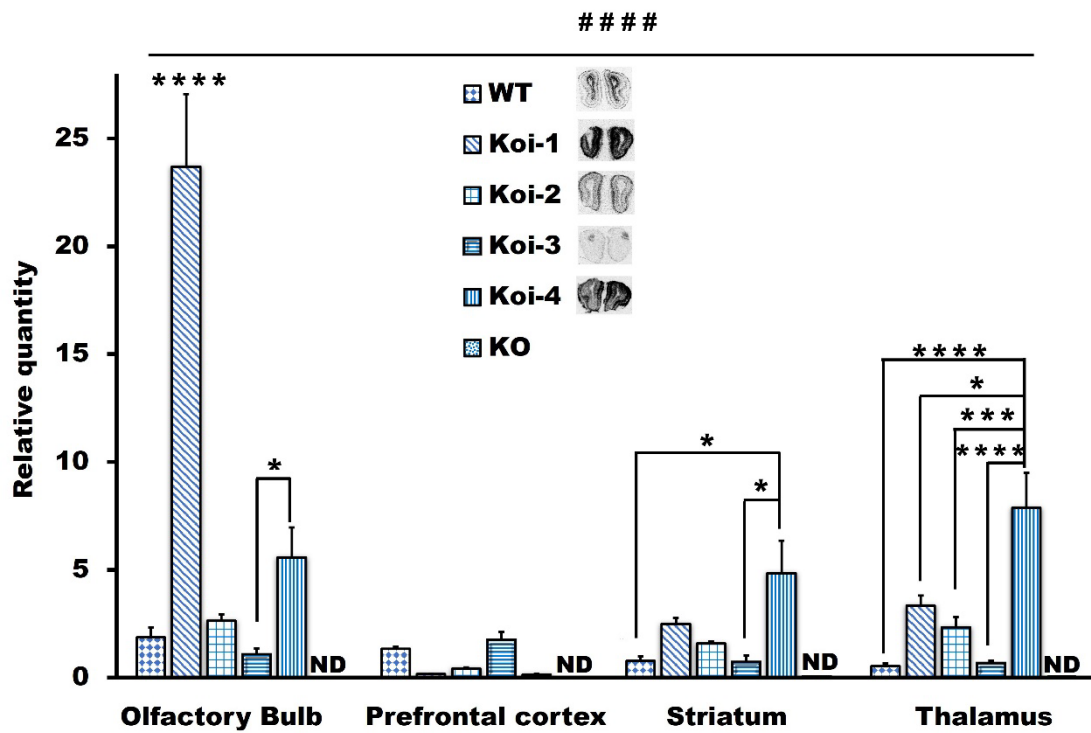

1106

1107

1108

1109

Supplementary Fig.5 Quantitative analysis of *Oxt* mRNA expression in different brain regions revealed by common primer set recognizing both *mOxt* and *pvOxt*.

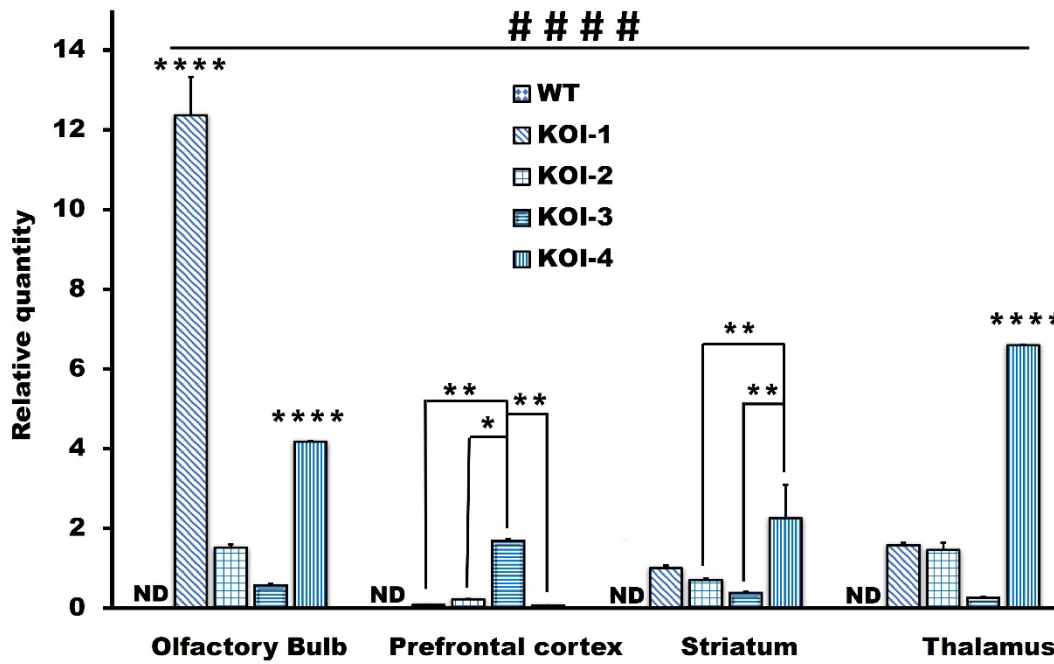

1110

1111 **Supplementary Fig.6 Quantitative analysis of *Oxt* mRNA expression in different**  
1112 **brain regions revealed by a primer set specifically recognizing *pvOxt*.**

1113

1114

1115

1116

1117

1118

1119

1120

1121

1122

1123

1124

1125

1126

1127

1128

1129

1130

1131

1132

|       | track      | ID                       | Cell/tissue  | Organism | Resolution | Restr. Enz. | Database | Database ID  | Browser | Publication    |
|-------|------------|--------------------------|--------------|----------|------------|-------------|----------|--------------|---------|----------------|
| Hi-C  | 1          | Whole brain              | whole brain  | mm10     | 40 Kb      | DNaseI      | 4DN      | 4DNFIQ48NYOW | WashU   | Deng 2015      |
|       | 2          | NPC                      | NPC          | mm10     | 40 Kb      | DpnII       | 4DN      | 4DNFIHW8NTQX | WashU   | Bonev 2017     |
|       | 3          | Cortex                   | cortex       | mm10     | 40 Kb      | Mbol        | 4DN      | 4DNFIJ3JV811 | WashU   | Du 2017        |
|       | 4          | ESC                      | ESC          | mm10     | 40 Kb      | DpnII       | 4DN      | 4DNFIU8AF5ZY | WashU   | Bonev 2017     |
|       | 5          | Hepatocyte               | hepatocyte   | mm10     | 40 Kb      | HindIII     | 4DN      | 4DNFIFULDMGN | WashU   | Schwarzer 2017 |
|       | 6          | Sperm                    | sperm        | mm10     | 40 Kb      | Mbol        | 4DN      | 4DNFIN8F14CS | WashU   | Du 2017        |
|       | <b>Fig</b> | <b>Regions</b>           | <b>Genes</b> |          |            |             |          |              |         |                |
| WashU | A          | chr6:104149809-119528368 | Oxtr         |          |            |             |          |              |         |                |
|       | B          | chr2:121804885-139358632 | Oxt          |          |            |             |          |              |         |                |

1133

1134

### 1135 **Supplementary Table.1**

1136 **The datasets IDs and sample information for mouse 3D chromatin verification**

1137

1138

1139

1140

1141

1142

1143

1144

1145

1146

1147

|       | track      | ID                    | Cell/tissue       | Organism | Resolution | Database  | Publication          |
|-------|------------|-----------------------|-------------------|----------|------------|-----------|----------------------|
| Hi-C  | 1          | Fetal brain           | Fetal Brain GZ    | hg19     | 10 Kb      | 3D genome | Won et al, 2016      |
|       | 2          | Hippocampus           | Human hippocampus | hg19     | 40 Kb      | 3D genome | Schmitt et al., 2016 |
|       | 3          | Cortex                | Cortex            | hg19     | 40 Kb      | 3D genome | Schmitt et al., 2016 |
| WashU | <b>Fig</b> | <b>Regions</b>        | <b>Genes</b>      |          |            |           |                      |
|       | A          | chr3:1831010-15559067 | OXTR              |          |            |           |                      |
|       | B          | chr20:0-15000000      | OXT               |          |            |           |                      |

1148

1149

### 1150 **Supplementary Table.2**

1151 **The datasets IDs and sample information for human 3D chromatin verification**

1152
